1 **Cytoplasmic Microtubule Organizing Centers Regulate Meiotic Spindle Positioning in**  
2 **Mouse Oocyte**

3

4

5 **Running title:** mcMTOCs regulate spindle positioning

6

7 DANIELA LONDONO VASQUEZ<sup>1</sup>, KATHERINE RODRIGUEZ-LUKEY<sup>1</sup>, SUSANTA K.  
8 BEHURA<sup>1</sup> & AHMED Z. BALBOULA<sup>1,2</sup>

9

10 1) Animal Sciences Research Center, University of Missouri, Columbia, MO 65211, USA

11 2) University of Cambridge, Department of Genetics, Downing Street, Cambridge, CB2 3EH, UK

12

13

14

15

16 **Keywords:** MTOC, Microtubule, Oocyte, Meiosis, Spindle positioning

17

18  
19  
20  
21  
22  
23  
24  
25  
26  
27  
28  
29  
30  
31  
32  
33  
34  
35  
36  
37

## ABSTRACT

During oocyte meiosis, migration of the spindle and its positioning must be tightly regulated to ensure elimination of the polar bodies and provide developmentally competent euploid eggs. Although the role of F-actin in regulating these critical processes has been studied extensively, little is known whether microtubules (MTs) participate in regulating these processes. Here, we characterize a pool of MTOCs in the oocyte that does not contribute to spindle assembly but instead remains free in the cytoplasm during metaphase I (metaphase cytoplasmic MTOCs; mcMTOCs). In contrast to spindle pole MTOCs, which primarily originate from the perinuclear region in prophase I, the mcMTOCs are found near the cortex of the oocyte. At nuclear envelope breakdown, they exhibit robust nucleation of MTs, which diminishes during polar body extrusion before returning robustly during metaphase II. The asymmetric positioning of the mcMTOCs provides the spindle with a MT-based anchor line to the cortex opposite the site of polar body extrusion. Depletion of mcMTOCs, by laser ablation, or manipulating their numbers, through inhibitors or inducers of autophagy, revealed that the mcMTOCs are required to regulate the timely migration and positioning of the spindle in meiosis. We discuss how forces exerted by F-actin in mediating movement of the spindle to the oocyte cortex are balanced by MT-mediated forces from the mcMTOCs to ensure spindle positioning.

## 38 INTRODUCTION

39 Mammalian oocytes enter meiosis during early fetal life. Soon after birth, meiotic oocytes  
40 undergo a lengthy arrest at the dictyate stage of the prophase I of the first meiotic division (MI) <sup>1</sup>.  
41 At the age of puberty, gonadotropin cues allow prophase I-arrested oocytes to resume MI evident  
42 by breakdown of the nuclear envelope (NEBD) and formation of a central bipolar spindle <sup>2-4</sup>. The  
43 central positioning of the spindle is required to establish proper kinetochore-MT attachments and  
44 to protect against aneuploidy. The position of the spindle dictates the plane of cell division <sup>5</sup> and  
45 therefore, in contrast to mitotic cells where a centrally positioned spindle allows symmetrical cell  
46 division, the meiotic spindle must migrate towards the cortex for the highly asymmetric meiotic  
47 divisions <sup>5,6</sup>. Such peripheral positioning of the spindle is critical to extrude the tiny polar body  
48 (PB) thereby retaining the great majority of the cytoplasm containing maternal RNAs and protein  
49 for the egg to support early embryonic development <sup>7,8</sup>. It is essential to understand the critical  
50 events of spindle positioning and migration, which are required for the fidelity of chromosome  
51 transmission to the next generation.

52

53 To date, F-actin and its regulatory molecules represent the only cytoskeletal components known  
54 to regulate spindle migration and positioning in the mammalian oocyte. It has been shown that  
55 perturbation of F-actin, but not of MTs, impairs spindle migration in oocytes and that the  
56 resulting increased symmetry of cell division results in infertility <sup>6,9-11</sup>. This contrasts with  
57 mitotically dividing somatic cells, where positioning of the spindle at the center of the cell is  
58 primarily regulated by the interaction of the astral MTs at its poles with the cell cortex <sup>12</sup>. Such  
59 astral MTs are nucleated by centrosomes, centriole pairs surrounded by peri-centriolar material  
60 (PCM). By contrast, mammalian oocytes lack classic centrosomes <sup>13</sup> because centrioles are lost

61 during early oogenesis through an unknown mechanism. The numerous acentriolar MT  
62 organizing centers of the oocyte (MTOCs)<sup>13,14</sup> are still able to nucleate astral-like MTs but these  
63 are short and unable to extend to the cortex when the spindle is centrally positioned<sup>14-16</sup>. These  
64 observations have enforced the notion that MTs have no role in regulating central spindle  
65 positioning and migration. It is therefore surprising that when mouse oocytes are treated with  
66 nocodazole, a MT depolymerizing agent, chromosomes migrate towards the cortex at a higher  
67 speed and at an earlier time than in control oocytes<sup>11,17</sup>. These unexplained observations suggest  
68 that MTs have, yet unknown, role(s) in regulating spindle migration and positioning in  
69 mammalian oocytes.

70

71 In prophase I-arrested oocytes, the MTOCs are initially found in the perinuclear region<sup>13</sup>. Then,  
72 before NEBD, these perinuclear MTOCs undergo distinct processes of decondensation,  
73 stretching and redistribution into a large number of smaller MTOCs<sup>18,19</sup>. The fragmented  
74 MTOCs are then clustered and sorted to form two poles necessary to assemble a bipolar spindle  
75<sup>14,20,21</sup>. Another pool of MTOCs is also present in the cytoplasm during NEBD. Some of these  
76 cytoplasmic MTOCs migrate from the periphery to the center of the egg, where they participate  
77 in spindle formation<sup>14,18</sup>. Another subset of cytoplasmic MTOCs, hereafter referred to as  
78 metaphase cytoplasmic MTOCs (mcMTOCs) does not contribute to spindle formation and has  
79 yet unknown biological significance for oocyte meiosis.

80

81 Here, we show that the pMTOCs and the mcMTOCs of MI oocytes represent two different  
82 functional sets. We find by 3D time-lapse imaging that mcMTOCs localize asymmetrically  
83 opposite the site of F-actin enrichment where the polar body is extruded. Super-resolution

84 Stimulated Emission Depletion (STED) microscopy reveals that mcMTOCs are able to nucleate  
85 MTs that connect the spindle to the cortex. Importantly, we show that by increasing mcMTOC  
86 numbers following treatment with an inhibitor of autophagy or by depleting them by laser  
87 ablation, the meiotic spindle becomes abnormally positioned leading to aneuploidy. Our results  
88 suggest a model whereby the role of F-actin in mediating movement of the meiotic spindle to the  
89 cortex is balanced by forces exerted from mcMTOCs to ensure the timely migration and accurate  
90 positioning of the spindle in the oocyte.

91

92

## 93 **RESULTS**

### 94 **MTOCs in the cytoplasm and at the spindle poles of meiotic oocytes**

95 The multiple MTOCs of prophase I-arrested oocytes follow distinct patterns of behavior.  
96 Immediately before NEBD, perinuclear MTOCs become fragmented in three phases;  
97 decondensation, stretching and repositioning towards the spindle poles through the sequential  
98 actions of Polo-like kinase 1, BicD2-anchored dynein, and the KIF11 motor protein<sup>18,19</sup>. Soon  
99 after NEBD, a second group of cytoplasmic MTOCs migrates from the periphery to the center of  
100 the oocyte, where it participates with perinuclear MTOCs in spindle assembly<sup>14,18</sup>. Finally, a  
101 third population of MTOCs persists in the cytoplasm of MI oocytes at metaphase (here termed  
102 mcMTOCs)<sup>16,22-25</sup>, whose role in meiosis is unknown. To follow the behavior of mcMTOCs  
103 during MI, we employed live imaging using 3D confocal microscopy to visualize prophase I-  
104 arrested oocytes (collected from CF-1 mice) expressing GFP-tagged Aurora A Kinase (AURKA-  
105 GFP, an integral component of MTOCs in mouse oocytes<sup>26-28</sup> and H2B-mCherry (H2B-mCh) to  
106 label MTOCs and DNA, respectively. As previously reported, perinuclear MTOCs became

107 fragmented into small multiple MTOCs at NEBD before they sorted and re-clustered at the two  
108 spindle poles as pMTOCs (Fig. 1A; Supplementary Movie 1). We also observed cytoplasmic  
109 MTOCs in the cytoplasm at NEBD, some of which migrated towards the oocyte center to  
110 contribute to spindle formation alongside pMTOCs whereas others, mcMTOCs remained free in  
111 the cytoplasm during prophase and metaphase I (Met I) after the bipolar spindle had formed (Fig.  
112 1A; Supplementary Movie 1). We carried out 3D reconstruction of entire oocytes to examine the  
113 number (Fig. 1 B,C) and volume (Fig. D, E) of the mcMTOCs (Supplementary Movie 2). In  
114 contrast to pMTOCs which undergo a time-dependent decrease in number and increase in  
115 volume (due to MTOC clustering) as the oocyte proceeds to Met I, the mcMTOCs displayed the  
116 opposite pattern and showed a time-dependent increase in number and volume in prophase and  
117 Met I (Fig. 1A,B,D; Supplementary Movies 1 and 2). Each oocyte had a variable number of  
118 mcMTOCs (between 4 and 12) at Met I located on different focal planes (Supplementary Movie  
119 3). The mcMTOCs became less distinct, appearing to be decreased in number and volume during  
120 anaphase I (Ana I) and telophase I (Telo I) before regaining their metaphase appearance as the  
121 oocytes arrested in Met II (Fig. 1A-E; Supplementary Movies 1 and 2). We confirmed that these  
122 AURKA-positive foci were indeed MTOCs by showing the colocalization of  $\gamma$ -tubulin, another  
123 integral component of PCM in meiotic oocytes<sup>20</sup> (Supplementary Fig. 1). To confirm our  
124 observations, we fixed CF-1 oocytes at different developmental stages (GV, Met I, Ana I/Telo I  
125 and Met II) and immunostained them to reveal the MTOC markers,  $\gamma$ -tubulin, pericentrin and  
126 Cep192<sup>18,29-31</sup>. This also revealed pMTOCs and mcMTOCs at Met I (Fig. 1F, G) that were able  
127 to nucleate asters of MTs ( $\alpha$ -tubulin staining, Fig. 1F). Similar findings were observed in Met I  
128 oocytes from C57BL/6 mice (Supplementary Fig. 2). Just as we observed in time-lapse imaging

129 of MTOCs in living oocytes, the mcMTOCs became less distinct in fixed preparations of oocytes  
130 in Ana I/Telo I of fixed MI oocytes.

131

### 132 **mcMTOCs undergo three patterns of directional movement during MI**

133 To dissect the directional motion and kinetics of the mcMTOCs, we tracked their movement in  
134 3D reconstructions over time during pro-Met I. In contrast to pMTOCs which primarily

135 originate from perinuclear MTOCs at NEBD, the mcMTOCs formed at the periphery of the  
136 oocyte (Fig. 2A; Supplementary Movie 4 and 5) and then appeared to undergo three phases of

137 directional movement. In the first phase, from NEBD to early Met I, the peripheral mcMTOCs  
138 moved towards the oocyte's center with an average speed of  $0.09 \pm 0.007 \mu\text{m min}^{-1}$  and a

139 maximum speed of  $0.18 \pm 0.005 \mu\text{m min}^{-1}$ . During this phase, the average volume of the  
140 mcMTOCs increased, in some cases due to mcMTOCs merging with each other (Fig. 2A;

141 Supplementary Movie 4 and 5). The second was marked by the slowing of mcMTOC movement  
142 to an average speed of  $0.06 \pm 0.009 \mu\text{m min}^{-1}$  allowing them to remain in confined areas of the

143 cytoplasm (Fig. 2B; Supplementary Movie 4). During this phase, the pMTOCs underwent active  
144 clustering whereas the mcMTOCs remained apart. The third phase occurred during Ana I and

145 Telo I when the mcMTOCs showed a reversal of their behavior in phase I; they displayed a  
146 drastic reduction in volume and migrated towards the cortex with an average speed of  $0.12 \pm$

147  $0.01 \mu\text{m min}^{-1}$  and a maximum speed of  $0.22 \mu\text{m min}^{-1}$  (Fig. 2C; Supplementary Movies 4 and  
148 6). In as many as 50% of oocytes (14/28), we were not able to observe mcMTOCs during Ana

149 I/Telo I but in all cases when they could be observed, the mcMTOCs migrated towards the  
150 region of cortex opposite direction the site of extrusion of the first PB. The mcMTOCs showed

151 independent directional movement to cytoplasmic droplets and so do not reflect overall

152 cytoplasmic movements (Supplementary Fig. 3). Taken together, our observations confirm that  
153 meiotic oocytes have two different pools of MTOCs and suggest that mcMTOCs differ from  
154 pMTOCs in their function.

155

### 156 **mcMTOCs localize asymmetrically to anchor the spindle to the cortex**

157 To determine whether the mcMTOCs were physically connected to pMTOCs, we employed  
158 immunocytochemistry and STED super-resolution microscopy to visualize the MTOCs in  
159 relation to MTs and F-actin. We confirmed that F-actin formed a cage around the spindle as  
160 previously reported<sup>10,32</sup> but could not detect any direct connection of F-actin between the  
161 pMTOCs and mcMTOCs (Supplementary Fig. 4). In contrast, we detected MTs originating from  
162 the mcMTOCs and linking them to both the oocyte cortex and the pMTOCs and spindle (Fig.  
163 3A,B). In addition, we also observed MTs connecting mcMTOCs with each other. Relatively  
164 short astral-like MTs could not reach the oocyte cortex unless they bind mcMTOCs  
165 (Fig. 3A,B). Thus, mcMTOCs enable MTs to bridge the gap between the spindle and the  
166 cortex. It was also evident from our observations that the mcMTOCs were asymmetrically  
167 distributed in the oocyte cytoplasm leading us to consider their relationship in time and space to  
168 the positioning of the spindle itself. In prophase arrest oocytes, the GV is usually found in a  
169 centralized location<sup>33-36</sup>. Consequently, the spindle also forms around the chromatin at or near  
170 the center of the oocyte before it migrates towards the cortex in late pro-Met to allow  
171 asymmetrical cell division. In all the oocytes examined, we found that the mcMTOCs were all  
172 asymmetrically positioned from the GV stage and throughout NEBD and early pro-Met I when  
173 the spindle is still localized centrally (Fig. 3C; Supplementary Movie 7). Strikingly, when the  
174 spindle began its actin-mediated migration, this took place towards the opposite side of the



175 oocyte to that occupied by mcMTOCs in the majority of the oocytes (38 out of 40 examined, Fig.  
176 3 C-E). These findings suggest a model whereby mcMTOCs localize asymmetrically to anchor  
177 the spindle to the cortex in such a way as to oppose the F-actin mediated force that builds to  
178 direct the spindle to the cortex on the opposite face of the oocyte for polar body extrusion. This  
179 would account for the unexplained finding that nocodazole-induced MT depolymerization during  
180 Met I results in the earlier migration of chromosomes towards the cortex at a relatively higher  
181 speed than in control oocytes (Supplementary Fig. 5) and others <sup>11</sup>. Thus, the mcMTOCs appear  
182 to enable opposing MT forces that counter spindle/chromosome migration that are necessary to  
183 regulate its timing and the final position of the spindle.

184

#### 185 **mcMTOCs regulate spindle positioning in acentriolar oocytes**

186 To determine the function(s) of mcMTOCs during MI and to test the above hypothesis, we  
187 selectively depleted mcMTOCs by two-photon laser ablation (Fig. 4A). The two-photon laser  
188 microscope has the advantage of offering deeper tissue penetration enabling efficient ablation  
189 and minimizing off-target effects <sup>37</sup>. We first microinjected prophase I-arrested oocytes with  
190 cRNAs encoding *Aurora A-GFP* and *eGFP-EB3* to label MTOCs and MTs, respectively. We  
191 then marked small cuboidal regions surrounding each mcMTOC, which we then exposed to a  
192 927 nm wavelength laser to ablate the mcMTOCs, (Fig. 4B; Supplementary Movie 8). We  
193 ensure reduction of fluorescence of each mcMTOC to background levels (compare images  
194 before ablation, Fig. 4B, upper panels, to after ablation, Fig. 4B, lower panels) before ablating  
195 the next. Importantly, laser ablation not only depleted the mcMTOCs but also disrupted their  
196 associated nucleation of MTs (Fig. 4C). We also exposed control oocytes to the same protocol by  
197 ablating random areas of the cytoplasm adjacent to but not overlapping with the mcMTOCs.

198 We confirmed the efficiency of mcMTOC depletion by immunostaining a subset of oocytes to  
199 reveal  $\gamma$ -tubulin and were only able to detect  $\gamma$ -tubulin foci in the cytoplasm but not at spindle  
200 poles (Supplementary Fig. 6). Control and mcMTOC-depleted oocytes were *in vitro* matured for  
201 16 h allowing us to assess the proportion of Met II eggs and determine their karyotype using an  
202 *in situ* chromosome counting technique<sup>38,39</sup>. We first noted that the depletion of mcMTOCs  
203 resulted in a significant increase in oocytes arrested at Met I compared to control oocytes (Fig.  
204 4D). Importantly, a relatively higher proportion of mcMTOC-depleted eggs were aneuploid (7  
205 out of 13 examined eggs) compared to controls (6 out of 24 examined eggs). Because depletion  
206 of mcMTOCs increased the percentage of oocytes arrested at Met I stage (Fig. 4D), we were not  
207 able to assess spindle positioning due to the high variability related to the meiotic stage and so  
208 we chose to arrest meiotic progression in Met I by incubating oocytes in meiotic maturation  
209 medium containing a proteasome inhibitor (MG-132). In this way, we could compare spindle  
210 positioning in such arrested oocytes (Fig. 4A). This revealed that whereas in control MI arrested  
211 oocytes, the spindle maintained its position over a period of 8h, the position of the spindle in  
212 mcMTOC-depleted oocytes was not stable (Fig. 4e; Supplementary Movie 9 and 10) and  
213 displayed considerable movement (Fig. 4F,G). Following the onset of spindle movement in  
214 mcMTOC-depleted oocytes, the spindle poles lost their integrity in contrast to control oocytes,  
215 likely due to the imbalance of forces on spindle poles (Supplementary Movie 9 and 10). Together  
216 this suggests that the mcMTOCs are required to position the MI spindle and maintain the  
217 integrity of the spindle poles.

218

219

220

221 **Autophagy regulates mcMTOC numbers and spindle positioning in meiotic oocytes**

222 In mitotic cells, autophagy plays an important role in regulating and maintaining the proper  
223 number of centrosomes where autophagy-deficient cells contained multiple centrosomes<sup>40,41</sup>.  
224 This led us to investigate the effects of inhibiting or inducing autophagy upon mcMTOC  
225 numbers and the consequences for meiosis. To this end, we chose to treat oocytes with 3-  
226 Methyladenine (3-MA), which inhibits autophagy by blocking autophagosome formation via the  
227 inhibition of type III Phosphatidylinositol 3-kinases (PI-3K). However, because 3-MA  
228 (autophagy inhibitor) blocks NEBD (data not shown), we treated oocytes with 3-MA  
229 immediately after NEBD. We also treated oocytes with rapamycin as an inducer of autophagy  
230 by adding the compound to the *in vitro* maturation medium during prophase I. In both cases, we  
231 allowed the treated oocytes (3-MA or rapamycin) together with controls to mature for 5 h post-  
232 NEBD prior to fixation and immunostaining using anti-Cep192 and anti- $\alpha$ -tubulin antibodies to  
233 label MTOCs and the spindle, respectively. We found that treatment with rapamycin resulted in a  
234 decrease in the number of mcMTOCs, compared to control oocytes (Fig. 5A-C). In contrast,  
235 treatment with 3-MA significantly increased the number of mcMTOCs, but not pMTOCs,  
236 compared to control oocytes (Fig. 5d-f). To determine the effect of such drug treatments upon  
237 spindle positioning, we used DIC imaging to track the position of chromosomes over time.  
238 Rapamycin-treated oocytes behaved in a similar way to controls; we could see no significant  
239 differences in the proportion of oocytes completing MI and extruding a polar body (Fig. 6A,B).  
240 Moreover, rapamycin-treated oocytes showed no differences to controls in chromosome  
241 positioning (Fig. 6A,F; Supplementary Movie 11 and 12), in the average time spent by  
242 chromosomes during migration to reach the cortex (Fig. 6C), in the total distance traveled by  
243 chromosomes until reaching the cortex; Fig. 6D), or in the average speed of migrating

244 chromosomes (Fig. 6E). By contrast, the increase in MTOC numbers following 3-MA treatment  
245 was associated with abnormal chromosome (spindle) positioning and orientation (Fig. 6A,F;  
246 Supplementary Movie 13 and 14) with chromosomes moving in circles in around 40% of oocytes  
247 treated with 3-MA. Accordingly, we found a significant increase in the distance traveled by  
248 chromosomes during migration until reaching the oocyte cortex (Fig. 6D). In line with our model  
249 that mcMTOC-mediated MTs anchor the spindle to the cortex opposite the PBE side to position  
250 the spindle centrally, we found that increasing mcMTOC numbers by 3-MA treatment resulted in  
251 a significant delay in chromosome migration towards the cortex (Fig. 6C), resulting from their  
252 significantly ( $p < 0.001$ ) reduced speed (Fig. 6E) in comparison to control oocytes. Indeed, we  
253 observed cases in which the chromosomes underwent segregation before the spindle had reached  
254 the cortex, resulting in enlarged polar bodies in around 21.05% of oocytes (Supplementary Movie  
255 14). The relatively weaker effect of rapamycin than 3-MA on spindle positioning could be  
256 attributed to our observation that average mcMTOC number in rapamycin-treated oocytes ( $\sim 4$ )  
257 remained within the range of mcMTOC numbers in control oocytes (between 4 and 12).  
258 Together, these data show that mcMTOC numbers must be regulated tightly, and provide further  
259 evidence that mcMTOCs play an important role in regulating the spindle position and timing of  
260 its migration in mouse oocytes.

261

## 262 **DISCUSSION**

263 To date, the only known function of acentriolar MTOCs in mouse oocytes is to assemble the  
264 spindle. Using 3D time-lapse confocal microscopy, we identify a subset of MTOCs that remain  
265 free in the cytoplasm during Met I of meiosis and which do not contribute to bipolar spindle  
266 assembly *per se*. In contrast to polar pMTOCs, which originate mainly from the perinuclear

267 MTOCs in prophase I, the mcMTOCs originate exclusively from MTOCs present in the  
268 cytoplasm in prophase I. The mcMTOCs are first observed near the oocyte cortex at NEBD; they  
269 increase in number and size while moving to a central position during Met I. STED super-  
270 resolution microscopy revealed that microtubules nucleated by the mcMTOCs connect one side  
271 of the spindle to the cortex during Met I. In Ana I/Telo I of MI, the mcMTOCs undergo a  
272 decrease in both number and size while migrating towards the cortex. When mcMTOCs  
273 functions were perturbed, either by laser ablation or treatment with 3-Methyladenine (3-MA) to  
274 inhibit type III Phosphatidylinositol 3-kinases and increase MTOC numbers, we have shown that  
275 the mcMTOCs play a role in regulating spindle positioning and the timing of its migration to the  
276 cortex.

277

278 To our knowledge, this is the first study of the function of mcMTOCs in living mammalian  
279 oocytes, which differ in several ways from the pMTOCs. The majority of pMTOCs, for  
280 example, originate from the perinuclear MTOCs, which never contribute to the mcMTOCs.  
281 Whereas the pMTOCs undergo a clustering-associated decrease in number and increase volume  
282 During pro-Met I/Met I, the mcMTOCs undergo a steady increase in both number and volume  
283 and rarely self-aggregate (~1.5% of all examined mcMTOCs). Interestingly, inhibition of  
284 autophagy with 3-MA increased the number of mcMTOCs, but not pMTOCs. Finally, in contrast  
285 to pMTOCs, mcMTOCs participated in spindle positioning but never contributed to bipolar  
286 spindle assembly. Together, these observations suggest that mammalian oocytes have two  
287 different functional sets of MTOCs and raise the future important challenge to determine  
288 whether differences in their biochemical compositions underlie their differences in function.  
289

290 The primary function of the spindle is to provide the machinery for faithful chromosome  
291 segregation. This is achieved in a series of critical, non-overlapping steps. First, during pro-Met I  
292 and early Met I, the spindle is assembled and positioned at or near the oocyte's center. Second,  
293 during the late Met I, the spindle migrates towards a sub-cortical location to allow asymmetrical  
294 cell division. Third, the spindle rotates from a parallel to a perpendicular position in relation to  
295 the cortex to allow PB extrusion. Many studies have emphasized the roles of F-actin and its  
296 motor proteins in regulating spindle positioning and migration<sup>9-11</sup> and two models have been  
297 proposed to explain how F-actin regulates spindle positioning and migration. In the first, F-actin  
298 enrichment at the cortex provides a spindle pulling force<sup>9</sup>. In the second, a spindle pushing force  
299 is mediated by the cytoplasmic F-actin meshwork<sup>11</sup>. Both models enforce the notion that an F-  
300 actin-mediated force on the spindle, whether pushing or pulling, acts towards the nearest cortical  
301 side through which the PB is extruded. On the other hand, spindle orientation seems to be  
302 dependent on both F-actin and MTs<sup>15</sup>. Astral-like MTs are only able to reach the cortex only  
303 when it is very close to the spindle poles<sup>15</sup>. Because astral-like MTs are relatively short and  
304 cannot easily reach the cortex, they can only establish contacts with MTs nucleated by  
305 mcMTOCs which, in turn, could act as amplifying sites that anchor the spindle to the cortex.  
306 This model, which we here propose, thus depends on the presence of two opposing forces:  
307 cyMTOC-mediated MTs at one side and F-actin at the other side of the spindle (Fig. 6). These  
308 opposing forces would be essential to position the spindle centrally during early Met I and to  
309 prevent premature spindle migration. Our model is consistent with three sets of observations: 1)  
310 mcMTOCs are exclusively localized asymmetrically, opposite the site of PB extrusion (the side  
311 of F-actin enrichment); 2) mcMTOCs undergo a significant decrease in number and volume  
312 during late Met I and Ana I/Telo I, allowing the F-actin mediated force to extrude the PB; and 3)

313 nocodazole-mediated MT depolymerization advances the timing of chromosome migration to the  
314 cortex, which takes place at a relatively higher speed <sup>11,17</sup> whereas increasing mcMTOC numbers  
315 delays chromosome migration to the cortex, which occurs at a relatively reduced speed compared  
316 to controls.

317

318 Depletion of mcMTOCs, disruption of mcMTOC numbers and MT depolymerization were each  
319 associated with abnormal spindle positioning and/or perturbed chromosome/spindle migration.

320 For example, increasing mcMTOC numbers by 3-MA treatment significantly decreased

321 chromosome speed and delayed chromosome migration towards the cortex. This phenotype

322 accords with increased mcMTOC-mediated MT forces that oppose F-actin; thereby preventing

323 proper spindle migration. Conversely, depleting mcMTOCs using laser ablation or MT

324 depolymerization has the reciprocal effect <sup>11,17</sup>. These findings indicate that the numbers of

325 mcMTOCs must be regulated tightly to regulate spindle positioning and timely spindle

326 migration.

327

328 In almost all mammals, including humans <sup>42,43</sup>, meiotic oocytes contain numerous acentriolar

329 MTOCs. This is in contrast to somatic mitotic cells, which contain only a pair of centrosomes

330 that are sufficient to assemble and position the spindle centrally. Positioning the spindle at the

331 center of mitotic cells depends on nucleating symmetrical astral MTs that anchor the spindle to

332 the cell cortex. However, the mechanism appears different during MI. Mammalian eggs are large

333 and the astral MTs from acentriolar MTOCs are relatively short. Yet, the cell must divide

334 asymmetrically, something that would likely be difficult for a pair of symmetrical centrosomes to

335 achieve. Our proposed model may, therefore, account for why meiotic oocytes rely upon two  
336 different functional sets of numerous MTOCs rather than a pair of typical centrosomes.

337

## 338 **MATERIAL AND METHODS**

### 339 **Ethics**

340 All animals were kept and experiments were conducted in accordance with UK Home Office  
341 regulations and the University of Missouri (Animal Care Quality Assurance Ref. Number, 9695).

342

### 343 **Oocyte collection, microinjection and culture**

344 Full-grown GV-arrested oocytes were isolated from CF-1 or C57BL/6 female mice (6-8-week-  
345 old) previously primed (~44 h before collection), with pregnant mare serum gonadotropin (Lee  
346 BioSolutions #493-10-10) according to <sup>44,45</sup>. Unless otherwise specified, CF-1 mice were used to  
347 conduct the experiments. Cumulus oocyte complexes (COCs) were collected and denuded using  
348 mechanical pipetting in bicarbonate-free minimal essential medium (MEM) containing 3 mg/ml  
349 polyvinylpyrrolidone (PVP) and 25 mM Hepes (pH 7.3) supplemented with 2.5  $\mu$ M milrinone  
350 (MilliporeSigma, St. Louis, MO, USA # M4659), a phospho diesterase inhibitor to arrest the  
351 oocytes at prophase I <sup>46</sup>. Prophase I-arrested oocytes were microinjected with 10-15 pl of cRNAs  
352 encoding fluorescently labeled proteins while cultured in milrinone-containing MEM medium.  
353 Microinjected oocytes were then cultured in Chatot, Ziomek, and Bavister (CZB) medium <sup>47</sup>  
354 supplemented with milrinone in a humidified incubator with 5% CO<sub>2</sub> in air at 37°C for ~3 h to  
355 allow protein expression before releasing into milrinone-free CZB medium and initiating *in vitro*  
356 maturation. Met I, Ana I/Telo I or Met II oocytes were collected at 4, 7 or 14 h after NEBD.



357 Nocodazole (MilliporeSigma #M1404), MG-132 (MilliporeSigma #474790), Rapamycin (Enzo  
358 Life Sciences, Farmingdale, NY, USA #BML-A275), 3-Methyladenine (3-MA, Cayman  
359 Chemical, Ann Arbor, MI, USA #13242) were dissolved in dimethyl sulfoxide (DMSO) and  
360 used at a final concentration of 7.5  $\mu$ M, 20  $\mu$ M and 10 mM, respectively. *In vitro* maturation was  
361 carried out in organ culture dishes under humidified conditions (Becton Dickinson #353037).

362

### 363 **Cloning and *in vitro* cRNA synthesis**

364 Generation of *Aurka-Gfp*, *H2b-mCherry* and *eGfp-Eb3* were described previously<sup>28,48</sup>. DNA  
365 linearization of *Aurka-Gfp* and *H2b-mCherry* constructs was carried out using Nde I (New  
366 England BioLabs), whereas DNA linearization of *eGfp-Eb3* construct was carried out using SfiI  
367 (New England BioLabs). Purification of linearized DNA was carried out according to the  
368 manufacturer's protocol (Qiagen, QIAquick PCR Purification). Purified DNA was *in vitro*  
369 transcribed using an mMessage mMachine T7 kit (Ambion) to generate *Aurka-Gfp* and *H2b-*  
370 *mCherry* cRNAs or mMessage mMachine T3 kit (Ambion) to generate *eGfp-Eb3* cRNA  
371 according to the manufacturer's instructions. cRNA purification was performed using an  
372 RNAEasy kit (Qiagen) and stored at  $-80^{\circ}\text{C}$ .

373

### 374 **Immunocytochemistry and fluorescence microscopy**

375 Meiotic oocytes were fixed for 20 min at room temperature in freshly prepared 2 %  
376 paraformaldehyde solution (MilliporeSigma #P6148) dissolved in phosphate buffer saline (PBS).  
377 Fixed oocytes were permeabilized in 0.1% Triton X-100 in PBS for 20 min prior to incubation  
378 for an additional 20 min in PBS containing 0.3% BSA and 0.01% Tween-20 (blocking solution).  
379 Primary antibody incubation was performed at room temperature for 1 h. Oocytes were then

380 washed three times (8-9 min each) prior to incubation with secondary antibodies for 1 h. Oocytes  
381 were washed again three times in blocking solutions for 8-9 min. To detect F-actin, phalloidin  
382 (Texas Red X Phalloidin, ThermoFisher Scientific #T7471; 1:50) was added to secondary  
383 antibody solutions. Oocytes were mounted on slides using Vectashield with 4',6-Diamidino-2-  
384 Phenylindole, Dihydrochloride (DAPI; Vector Laboratories, Burlingame, CA, USA) to stain  
385 DNA. To label DNA for STED super-resolution imaging, 5 mg/ml Hoechst 33342 was used  
386 (Molecular Probes H3570). The following primary antibodies were used in immunofluorescence:  
387  $\alpha$ -tubulin-Alexa Fluor 488 conjugate (Life Technologies #322 588; 1:100), Cep192 (Young In  
388 Frontier #AR07-PA0001; 1:100),  $\gamma$ -tubulin (Millipore-Sigma #T6557; 1:75), Pericentrin (BD  
389 Biosciences #611814; 1:100), CREST autoimmune serum (Antibodies Incorporated #15-234;  
390 1:25). Omitting the primary antibody served as a negative control. Fluorescence signals were  
391 detected under a 63X objective using Leica TCS SP8 confocal microscope equipped with 3-  
392 color, 3-D STED super-resolution 3X system. Images were captured to span the entire oocyte at  
393 3  $\mu$ m Z-intervals (confocal microscopy) or 0.5  $\mu$ m Z-intervals (STED super-resolution  
394 microscopy). All images were acquired using the same laser power when the intensity of  
395 fluorescence is quantified.

396

### 397 **Time-lapse confocal microscopy**

398 Oocytes expressing fluorescently labeled proteins were transferred to milrinone-free CZB  
399 medium and imaged over time under a 63X objective using Leica TCS SP8 confocal microscope  
400 equipped with microenvironmental chamber to maintain the oocytes at controlled CO<sub>2</sub> (5%) and  
401 temperature (37 °C) in a humidified air. DIC, GFP and mCherry image acquisitions were started  
402 at prophase I stage and images were captured every certain time according to each experimental

403 design (as indicated in corresponding figure legends). Images were captured to span the entire  
404 region including all MTOCs at 3  $\mu\text{m}$  Z-intervals.

405

#### 406 **Depletion of mcMTOCs using laser ablation**

407 Depletion of mcMTOCs was carried out using two-photon laser ablation which has the  
408 advantage of offering deeper tissue penetration, efficient ablation and minimizing off-target  
409 effects<sup>37</sup>. Two different microscopes were used. Oocytes expressing fluorescently labeled  
410 proteins were transferred to milrinone-free MEM medium and mcMTOCs were ablated using  
411 upright LaVision BioTec TriM Scope II (with controlled temperature at 37 °C) or to milrinone-  
412 free CZB medium if Leica TCP SP8 two-photon inverted microscope (equipped with  
413 microenvironmental chamber to control CO<sub>2</sub> and temperature) was used. In both cases, a small  
414 square area(s) surrounding mcMTOCs were marked and then exposed to a laser with 927 nm  
415 wavelength. We compared the first image (before ablation) and the second image (after ablation)  
416 in the time series cycle to ensure that after ablation, the fluorescence in the targeted mcMTOCs  
417 decreased to that observed at the background levels. Next, we moved the focal plane and ablated  
418 the remaining mcMTOCs. McMTOC-depleted oocytes underwent live imaging using the same  
419 parameters. Control oocytes were exposed to the same protocol except ablating random areas of  
420 the cytoplasm, just adjacent and equal to the same size and number of mcMTOCs.

421

#### 422 **Image processing and analysis**

423 Images acquired using 3-D STED super-resolution microscopy were deconvolved using Huygens  
424 Professional software before image analysis. NIH image J software (National Institute of Health,  
425 Bethesda, MD, USA) was used to process and analyze the images of fixed oocytes. The speed

426 and average distance of chromosome/spindle/MTOCs at their final position over time were  
427 analyzed using the manual tracking function of NIH image J software. The point of intersection  
428 between the line connecting the two dominant spindle poles and spindle midzone was used to  
429 determine the position of the spindle. The point of intersection between the two lines  
430 representing the minor axis length and the major axis length of chromosomes was used to  
431 determine the position of all chromosomes<sup>49</sup>. The speed and distance for each MTOC were  
432 analyzed separately before calculating the average for all MTOCs within each oocyte. 3D  
433 reconstruction of MTOCs, MTOC number and volume were processed and analyzed using  
434 isosurface spot analysis feature of Imaris software (Bitplane, Zürich, Switzerland) according to  
435<sup>18</sup>. Briefly, based on MTOC signal to noise, the threshold value was adjusted on an oocyte-to-  
436 oocyte basis followed by MTOC surface segmentation. MTOC number was calculated using the  
437 spot analysis feature, whereas MTOC volume was analyzed using surface analysis feature.  
438 mcMTOCs were quantified after excluding the pMTOCs manually, and *vice versa*. Same  
439 processing parameters were applied for each experimental analysis

440

#### 441 ***In situ* chromosome counting**

442 Oocytes at Met II stage (12 h post-NEBD) were treated with 100  $\mu$ M monastrol (MilliporeSigma  
443 #M8515), an Eg5-kinesin inhibitor to induce monopolar spindle formation with subsequent  
444 chromosome dispersion<sup>38,39</sup>. Oocytes were fixed and immunostained by Cep192, pericentrin, as  
445 previously mentioned with CREST autoimmune serum to detect kinetochores. Oocytes were then  
446 mounted onto a glass slide using Vectashield with DAPI (Vector Laboratories) to label DNA.  
447 Confocal microscopy was used to image the entire region of the chromosomes at 0.7- $\mu$ m Z-

448 intervals to capture all kinetochores. Serial confocal sections were analyzed and the total number  
449 of kinetochores were counted using NIH image J software.

450

#### 451 **Statistical analysis**

452 One-way ANOVA, Student t-test and chi-square contingency test were used to evaluate the  
453 differences between groups using GraphPad Prism. ANOVA test was followed by the Tukey  
454 post hoc test to allow the comparison among groups. The differences of  $P < 0.05$  were  
455 considered significant. The data were expressed as means  $\pm$  SEM.

456

#### 457 **FUNDING**

458 This study was supported by Marie Sklodowska-Curie Fellowship 706170, Horizon 2020,  
459 European Commission and laboratory start-up funding from the University of Missouri to AZB.

460

#### 461 **ACKNOWLEDGMENTS**

462 The authors would like to thank Dr. David Glover, California Institute of Technology, USA for  
463 critical reading and editing the manuscript, and for providing resources. The authors would like  
464 to thank all members of the Glover lab and the Balboula lab for valuable help and discussions.

465

#### 466 **DECLARATION OF INTEREST**

467 The authors declare that there is no conflict of interest that could be perceived as prejudicing the  
468 impartiality of the research reported.

469

470

471

472 **FIGURE LEGENDS**

473 **Figure 1: Two different sets of MTOCs are present in acentriolar oocytes.** (A) Time-lapse  
474 confocal microscopy of MTOCs in live oocytes. Full-grown prophase-I oocytes were injected  
475 with cRNAs encoding *H2b-mCherry* (red) and *Aurka-Gfp* (pseudo white), incubated in  
476 milrinone-containing CZB medium for 3 h, followed by *in vitro* maturation. Shown are  
477 representative images (Z-projection of 16 sections every 3  $\mu\text{m}$ ) from a time course (see  
478 Supplemental Movie 1). Lower panels represent a 3D reconstruction of MTOCs from oocyte  
479 shown in upper panels (see Supplemental Movie 2). Fluorescence images were captured every  
480 20 min (time, h:min). The scale bar represents 10  $\mu\text{m}$ . The white arrow represents cytoplasmic  
481 MTOC that participate in spindle pole formation as a pMTOC. White arrowhead represents  
482 cytoplasmic MTOC that remains in the cytoplasm during Met I (mcMTOC). (B,D)  
483 Quantification of average MTOC number and MTOC volume over time during meiosis I,  
484 respectively. Error bars show S.D. Dashed blue lines represent the time of Ana I onset. (C,E).  
485 Quantification of average MTOC number and MTOC volume, respectively, during metaphase I  
486 (Met I) and anaphase I/telophase I (Ana I/Telo I) stages. The data are expressed as mean  $\pm$  SEM.  
487 Student t-test was used to analyze the data. Values with asterisks vary significantly, \*\*\*\*P <  
488 0.0001. The total number of analyzed oocytes (from three independent replicates) is specified  
489 above each graph. (F) Fully grown prophase-I-arrested oocytes were *in vitro* matured for 0 (Pro  
490 I, prophase I), 8 h (Met I), 9 h (Ana I/Telo I) or 16 h (Met II) prior to fixation and  
491 immunocytochemistry using  $\gamma$ -tubulin and  $\alpha$ -tubulin antibodies to label MTOCs (red) and  
492 microtubules (grey). DAPI was used to detect DNA (blue). (G) Fully grown prophase-I-arrested  
493 oocytes were *in vitro* matured for 8 h (Met I) followed by fixation and immunostaining using  
494 Cep192 (red) and pericentrin (grey) antibodies to label MTOCs. DAPI was used to detect DNA

495 (blue). Shown are representative confocal z-projections. Arrowheads represent mcMTOCs. A  
496 total of 184 oocytes were examined. Scale bars represent 10  $\mu\text{m}$ .

497

498 **Figure 2: mcMTOCs exhibit three different directional behaviors during meiosis I.**

499 Tracking of 3D reconstructed mcMTOCs from time-lapse confocal microscopy in live oocytes  
500 during three different phases: (A) nuclear envelope breakdown (NEBD)- early metaphase I (Met  
501 I, see Supplemental Movie 4 and 5), (B) Met I (see Supplemental Movie 4) and (C) late Met I-  
502 telophase I (Telo I), see Supplemental Movie 5 and 6. Full-grown prophase-I oocytes were  
503 injected with cRNAs encoding *H2b-mCherry* (red) and *Aurka-Gfp* (pseudo white), incubated in  
504 milrinone-containing CZB medium for 3 h prior to *in vitro* maturation. Shown are representative  
505 images of 3D reconstructed Z-projection of 16 sections every 3  $\mu\text{m}$  from a time course.  
506 Fluorescence images were captured every 15 min (time, h:min). The scale bar represents 20  $\mu\text{m}$ .  
507 Right panels show a zoomed area of mcMTOC tracking over time. White arrows represent the  
508 overall direction of displacement calculated automatically by Bitplane Imaris software.  
509 Arrowheads represent mcMTOCs. The total number of analyzed oocytes is 34.

510

511 **Figure 3: mcMTOCs anchor the spindle to the cortex.** (A) Fully grown prophase-I-  
512 arrested oocytes were *in vitro* matured for 6 h (metaphase I) prior to fixation and  
513 immunocytochemistry using  $\gamma$ -tubulin and  $\alpha$ -tubulin antibodies to label MTOCs (red) and  
514 microtubules (grey). Hoechst was used to detect DNA (blue). Fluorescence signals were detected  
515 under a 63X objective using STED super-resolution system. Shown is a representative image (Z-  
516 projection of 65 sections every 0.5  $\mu\text{m}$ ). (B) Example of fluorescence intensity of microtubules in  
517 “B”, connecting pMTOCs, mcMTOCs and the cortex, using the ‘plot profiles’ function in

518 ImageJ. The scale bar represents 10  $\mu\text{m}$ . (C) Representative images (Z-projection of 16 sections  
519 every 3  $\mu\text{m}$ ) of time-lapse confocal microscopy of a live oocyte expressing AURKA-GFP  
520 (MTOCs) and H2B-mCherry (chromosomes) from a time course (see Supplemental Movie 7).  
521 Fluorescence and bright-field images (lower panels) were captured every 20 min (time, h:min).  
522 Arrowheads represent mcMTOCs. Scale bars represent 10  $\mu\text{m}$ . (D) Schematic diagram shows  
523 how the proportion of polar body extrusion side in relation to mcMTOC position was assessed.  
524 (E) Quantification of the proportion of polar body extrusion side from “C” according to “D”. The  
525 data are expressed as mean  $\pm$  SEM. Student t-test was used to analyze the data. Values with  
526 asterisks vary significantly, \*\*\*\* $P < 0.0001$ . The total number of analyzed oocytes (from three  
527 independent replicates) is specified above the graph.

528

529 **Figure 4: mcMTOCs are required to regulate spindle positioning in meiotic**

530 **oocytes.** (A) Schematic diagram shows the experimental design following mcMTOC depletion.

531 (B-G) Oocytes expressing AURKA-GFP and eGFP-EB3 were *in vitro* matured for 6 h

532 (metaphase I, Met I), transferred to CZB medium with or without MG-132, followed by

533 mcMTOC depletion using two-photon laser ablation. Small square area(s) surrounding

534 mcMTOCs were marked and then exposed to a laser with 927 nm wavelength. Control oocytes

535 were exposed to the same parameters except ablating random areas of the cytoplasm, just

536 adjacent and equal to the same size and number of mcMTOCs. (B) Z-sections of 3D time-lapse

537 imaging of a live oocyte during mcMTOC ablation (see Supplemental Movie 8). Black

538 arrowheads represent mcMTOCs before ablation (upper panels). White arrowheads represent

539 laser beam targets (middle panels). (C) Z-sections of 3D time-lapse imaging of live oocyte to

540 track microtubules (eGFP-EB3) following mcMTOC ablation. Black arrow represents mcMTOC



541 before ablation (-3 S). Black arrowheads track microtubules over time. The scale bar represents  
542 20  $\mu\text{m}$ . (D) control and mcMTOC-depleted oocytes were *in vitro* matured in MG-132-free  
543 medium until Met II (16 h) and assessed for extrusion of the first polar body (PBE). The data are  
544 expressed as mean  $\pm$  SEM. chi-square contingency test was used to analyze the data. Values with  
545 asterisks vary significantly,  $**P < 0.01$ . The total number of analyzed oocytes in each group  
546 (from two independent replicates) is specified above each condition within each graph. (E) Z-  
547 projection (16 sections every 3  $\mu\text{m}$ ) of 3D time-lapse microscopy of control (see Supplemental  
548 Movie 9) and mcMTOC-depleted (see Supplemental Movie 10) Met I oocytes while cultured in  
549 MG-132-containing medium for additional 9 h to track the spindle. Fluorescence images were  
550 captured every 3 min (time, h:min). White arrowheads represent the tracking path of all time  
551 periods. The scale bar represents 10  $\mu\text{m}$ . (F) Quantification of total distance traveled by the  
552 spindle. (G) Quantification of average spindle speed. The data are expressed as mean  $\pm$  SEM.  
553 Student t-test was used to analyze the data. Values with asterisks vary significantly,  $****P <$   
554 0.0001. The total number of analyzed oocytes (from two independent replicates) is specified  
555 above each graph.

556

557 **Figure 5: Autophagy regulates mcMTOC numbers in meiotic oocytes.** (A) Full-grown  
558 prophase-I oocytes were divided into two groups and treated with DMSO or Rapamycin (added  
559 at 0 h after collection) followed by *in vitro* maturation until metaphase I (Met I, 7h). Met I  
560 oocytes were fixed and immunostained using Cep192 and  $\alpha$ -tubulin antibodies to label MTOCs  
561 (red) and microtubules (grey). DAPI was used to detect DNA (blue). (B) Quantification of  
562 average mcMTOC number in “A”. (C) Quantification of average pMTOC number in “A”. (D)  
563 Full-grown prophase-I oocytes were divided into two groups and treated with DMSO or 3-MA

564 (added at NEBD) followed by *in vitro* maturation until metaphase I (Met I, 7h). Met I oocytes  
565 were fixed and immunostained using Cep192 and  $\alpha$ -tubulin antibodies to label MTOCs (red) and  
566 microtubules (grey). DAPI was used to detect DNA (blue). (E) Quantification of average  
567 mcMTOC number in “D”. (F) Quantification of average pMTOC number in “D”. Arrowheads  
568 represent mcMTOCs. The data are expressed as mean  $\pm$  SEM. Student t-test was used to analyze  
569 the data. Values with asterisks vary significantly, \*P < 0.05, \*\*\*\*P < 0.0001. The total number  
570 of analyzed oocytes (from two independent replicates) is specified above each graph.

571

572 **Figure 6: Autophagy regulates spindle positioning in meiotic oocytes.**

573 (A) Z-projection (16 sections every 3  $\mu$ m) of time-lapse imaging of DMSO, Rapamycin (Rap)  
574 and 3-MA-treated oocytes (see Supplemental Movie 11, 12, 13 and 14, respectively). Images  
575 were captured every 30 min. White arrows represent the direction of chromosome displacement.  
576 Scale bars represent 10  $\mu$ m. Lower panels of each group show the tracking path (blue) over time.  
577 (B) Quantification of the percentage of first polar body extrusion (PBE). (C) Quantification of  
578 the average time spent by chromosomes from the start of migration till reaching the cortex. (D)  
579 Quantification of the total distance traveled by chromosomes from the start of migration until  
580 reaching the cortex. (E) Quantification of average chromosome speed during migration. (F)  
581 Quantification of the percentage of oocytes exhibiting abnormal spindle positioning and  
582 orientation prior to reaching the oocyte cortex. Arrows represent the direction of chromosome  
583 displacement. The data are expressed as mean  $\pm$  SEM. One-way ANOVA was used to analyze  
584 the data. Values with asterisks vary significantly, \*P < 0.05, \*\*\*P < 0.001, \*\*\*\*P < 0.0001. The  
585 total number of analyzed oocytes (from three independent replicates) is specified above each  
586 graph.

587 **Figure 7: Schematic model for spindle positioning in the meiotic oocyte.**

588

589 **Supplementary Figure 1: AURKA-GFP foci colocalize with pericentriolar material protein**

590 **( $\gamma$ -tubulin) at mcMTOCs.** Full-grown prophase-I oocytes were injected with *Aurka-*

591 *Gfp* (green), incubated in milrinone-containing CZB medium for 3 h, followed by *in vitro*

592 maturation. Metaphase I oocytes were fixed and immunostained using  $\gamma$ -tubulin antibody to label

593 MTOCs (red). DAPI was used to detect DNA (blue). Shown are representative Z-projection of

594 confocal images. The scale bar represents 10  $\mu$ m.

595

596 **Supplementary Figure 2: MTOCs in the cytoplasm and at the spindle poles of meiotic**

597 **oocytes collected from C57BL/6 mice.** Full-grown prophase-I oocytes collected from C57BL/6

598 mice were *in vitro* matured for 7 h. Metaphase I oocytes were fixed and immunostained using  $\gamma$ -

599 tubulin and  $\alpha$ -tubulin antibodies to label MTOCs (red) and microtubules (grey). DAPI was used

600 to detect DNA (blue). Arrowheads represent mcMTOCs. Shown are representative Z-projection

601 of confocal images. The scale bar represents 10  $\mu$ m.

602

603 **Supplementary Figure 3: mcMTOC movement does not follow the movement of the**

604 **cytoplasm.** Representative images (Z-projection of 16 sections every 3  $\mu$ m) of time-lapse

605 confocal microscopy of live oocytes expressing AURKA-GFP (MTOCs) and H2B-mCherry

606 (chromosomes) from a time course. Fluorescence and bright-field images (lower panels) were

607 captured every 15 min (time, h:min). The white arrow represents cytoplasmic droplet. Lower

608 panels show the tracking of both cytoplasmic droplet (green) and mcMTOC (blue). The scale bar

609 represents 10  $\mu$ m.

610 **Supplementary Figure 4: F-actin localization in mouse oocytes.** Full-grown prophase-I  
611 oocytes collected from C57BL/6 mice were *in vitro* matured for 7 h. Metaphase I oocytes were  
612 fixed and immunostained using  $\gamma$ -tubulin to label MTOCs (red). Hoechst stain was used to detect  
613 DNA (blue) and phalloidin stain was used to detect F-actin (pseudo green). Shown are  
614 representative Z-projection. The scale bar represents 10  $\mu$ m.

615

616 **Supplementary Figure 5: Inhibition of MTs accelerates chromosome migration towards the**  
617 **cortex in meiotic oocytes.** Full-grown prophase-I oocytes were divided into two groups and  
618 treated with DMSO or nocodazole (added at 0 h after collection) followed by *in vitro* maturation  
619 and time-lapse imaging. Images were captured every 15 min. (A) Quantification of the average  
620 time spent by chromosomes until reaching the cortex. (B) Quantification of average chromosome  
621 speed during migration. The data are expressed as mean  $\pm$  SEM. Student-t test was used to  
622 analyze the data. Values with asterisks vary significantly, \*\*\*P < 0.001, \*\*\*\*P < 0.0001. The  
623 total number of analyzed oocytes (from two independent replicates) is specified above each  
624 graph.

625

626 **Supplementary Figure 6: Two-photon laser ablation efficiently depletes mcMTOCs.**  
627 Oocytes expressing AURKA-GFP and eGFP-EB3 were *in vitro* matured for 6 h (metaphase I,  
628 Met I), transferred to CZB medium with MG-132, followed by mcMTOC depletion using two-  
629 photon laser ablation. Small square area(s) surrounding mcMTOCs were marked and then  
630 exposed to a laser with 927 nm wavelength. Control oocytes were exposed to the same  
631 parameters except ablating random areas of the cytoplasm, just adjacent and equal to the same  
632 size and number of mcMTOCs. Control and mcMTOC-ablated oocytes were fixed and

633 immunostained using  $\gamma$ -tubulin antibody to label MTOCs. DAPI was used to detect DNA (blue).  
634 Arrowheads represent mcMTOCs. Shown are representative Z-projection of confocal images.  
635 The scale bar represents 10  $\mu$ m.

636

637 **Supplementary Movie 1:** Time-lapse confocal microscopy of MTOCs in live oocyte. The  
638 full-grown prophase-I oocyte was injected with cRNAs encoding *H2b-mCherry* (red) and *Aurka-*  
639 *Gfp* (pseudo grey), followed by *in vitro* maturation. Fluorescence images (Z-projection of 16  
640 sections every 3  $\mu$ m) were captured every 20 min (time, h:min). Same oocyte as shown in Fig.  
641 1A (upper panels). The scale bar represents 10  $\mu$ m.

642

643 **Supplementary Movie 2:** 3D reconstruction of MTOCs from the oocyte in Supplementary  
644 Movie 1. Same oocyte as shown in Fig. 1B (lower panels).

645

646 **Supplementary Movie 3:** 3D reconstruction of MTOCs from the oocyte in Supplementary  
647 Movie 1 during metaphase I.

648

649 **Supplementary Movie 4:** Time-lapse confocal microscopy of MTOCs in live oocyte. The  
650 full-grown prophase-I oocyte was injected with cRNAs encoding *H2b-mCherry* (red) and *Aurka-*  
651 *Gfp* (pseudo grey), followed by *in vitro* maturation. Fluorescence images (Z-projection of 16  
652 sections every 3  $\mu$ m) were captured every 15 min (time, h:min). The scale bar represents 20  $\mu$ m.

653 **Supplementary Movie 5:** Tracking of 3D reconstructed mcMTOCs from the oocyte in  
654 Supplementary Movie 4 during nuclear envelope breakdown (NEBD) to early metaphase I (Met  
655 I). Same oocyte as shown in Fig. 2A.

656

657 **Supplementary Movie 6:** Tracking of 3D reconstructed mcMTOCs from the oocyte in  
658 Supplementary Movie 4 during late metaphase I to telophase I. Same oocyte as shown in Fig.  
659 2C.

660

661 **Supplementary Movie 7:** Time-lapse confocal microscopy of MTOCs in live oocyte. The  
662 full-grown prophase-I oocyte was injected with cRNAs encoding *H2b-mCherry* (red) and *Aurka-*  
663 *Gfp* (pseudo grey), followed by *in vitro* maturation. Fluorescence and bright-field images (Z-  
664 projection of 16 sections every 3  $\mu\text{m}$ ) were captured every 20 min (time, h:min). Same oocyte as  
665 shown in Fig. 3C (lower panels). The scale bar represents 10  $\mu\text{m}$ .

666

667 **Supplementary Movie 8:** 3D time-lapse imaging of live oocyte expressing AURKA-GFP  
668 (pseudo grey) and eGFP-EB3 (pseudo grey) during mcMTOC ablation. The white squares  
669 represent the actual laser beam targets. Same oocyte as shown in Fig. 4B.

670

671 **Supplementary Movie 9:** Tracking the spindle over time in control oocyte (non-mcMTOC-  
672 ablated) expressing AURKA-GFP (pseudo grey) and eGFP-EB3 (pseudo grey), while cultured in  
673 MG-132-containing medium for 9 h, using 3D time-lapse microscopy. Fluorescence images were  
674 captured every 3 min (time, h:min). The scale bar represents 10  $\mu\text{m}$ . Same oocyte as shown in  
675 Fig. 4E.

676

677 **Supplementary Movie 10:** Tracking the spindle over time in mcMTOC-laser-ablated oocyte  
678 expressing AURKA-GFP (pseudo grey) and eGFP-EB3 (pseudo grey), while cultured in MG-

679 132-containing medium for 9 h, using 3D time-lapse microscopy. Fluorescence images were  
680 captured every 3 min (time, h:min). The scale bar represents 10  $\mu$ m. Same oocyte as shown in  
681 Fig. 4E.

682

683 **Supplementary Movie 11:** Tracking the chromosomes over time in DMSO-treated oocytes  
684 during meiosis I. Bright-field images (Z-projection of 16 sections every 3  $\mu$ m) were captured  
685 every 30 min (time, h:min). Prophase -I stage represents 0 h. Same oocyte as shown in Fig. 6A  
686 (Control). The scale bar represents 10  $\mu$ m.

687

688 **Supplementary Movie 12:** Tracking the chromosomes over time in Rapamycin-treated  
689 oocytes during meiosis I. Bright-field images (Z-projection of 16 sections every 3  $\mu$ m) were  
690 captured every 30 min (time, h:min). Prophase -I stage represents 0 h. Same oocyte as shown in  
691 Fig. 6A (Rapamycin). The scale bar represents 10  $\mu$ m.

692

693 **Supplementary Movie 13:** Tracking the chromosomes over time in 3-MA-treated oocytes  
694 during meiosis I. Bright-field images (Z-projection of 16 sections every 3  $\mu$ m) were captured  
695 every 30 min (time, h:min). Prophase -I stage represents 0 h. Same oocyte as shown in Fig. 6A  
696 (3-MA, upper panels). The scale bar represents 10  $\mu$ m.

697

698 **Supplementary Movie 14:** Tracking the chromosomes over time in 3-MA-treated oocytes  
699 during meiosis I (another representative showing defective asymmetrical division). Bright-field  
700 images (Z-projection of 16 sections every 3  $\mu$ m) were captured every 30 min (time, h:min).

701 Prophase -I stage represents 0 h. Same oocyte as shown in Fig. 6A (3-MA, lower panels). The  
702 scale bar represents 10  $\mu\text{m}$ .

703

704

705



## 706 REFERENCES

- 707 1 Von Stetina, J. R. & Orr-Weaver, T. L. Developmental control of oocyte maturation and  
708 egg activation in metazoan models. *Cold Spring Harb Perspect Biol* 3, a005553,  
709 doi:10.1101/cshperspect.a005553 (2011).
- 710 2 Hashimoto, N. & Kishimoto, T. Regulation of meiotic metaphase by a cytoplasmic  
711 maturation-promoting factor during mouse oocyte maturation. *Dev Biol* 126, 242-252,  
712 doi:10.1016/0012-1606(88)90135-2 (1988).
- 713 3 Bennabi, I., Terret, M. E. & Verlhac, M. H. Meiotic spindle assembly and chromosome  
714 segregation in oocytes. *J Cell Biol* 215, 611-619, doi:10.1083/jcb.201607062 (2016).
- 715 4 Kitajima, T. S., Ohsugi, M. & Ellenberg, J. Complete kinetochore tracking reveals error-  
716 prone homologous chromosome biorientation in mammalian oocytes. *Cell* 146, 568-581,  
717 doi:10.1016/j.cell.2011.07.031 (2011).
- 718 5 McCarthy, E. K. & Goldstein, B. Asymmetric spindle positioning. *Curr Opin Cell Biol*  
719 18, 79-85, doi:10.1016/j.ceb.2005.12.006 (2006).
- 720 6 Longo, F. J. & Chen, D. Y. Development of cortical polarity in mouse eggs: involvement  
721 of the meiotic apparatus. *Dev Biol* 107, 382-394 (1985).
- 722 7 Menezo, Y. J. Paternal and maternal factors in preimplantation embryogenesis:  
723 interaction with the biochemical environment. *Reprod Biomed Online* 12, 616-621,  
724 doi:10.1016/s1472-6483(10)61188-1 (2006).
- 725 8 Ma, J., Zeng, F., Schultz, R. M. & Tseng, H. Basonuclin: a novel mammalian maternal-  
726 effect gene. *Development* 133, 2053-2062, doi:10.1242/dev.02371 (2006).
- 727 9 Schuh, M. & Ellenberg, J. A new model for asymmetric spindle positioning in mouse  
728 oocytes. *Curr Biol* 18, 1986-1992, doi:10.1016/j.cub.2008.11.022 (2008).
- 729 10 Azoury, J. et al. Spindle positioning in mouse oocytes relies on a dynamic meshwork of  
730 actin filaments. *Curr Biol* 18, 1514-1519, doi:10.1016/j.cub.2008.08.044 (2008).
- 731 11 Li, H., Guo, F., Rubinstein, B. & Li, R. Actin-driven chromosomal motility leads to  
732 symmetry breaking in mammalian meiotic oocytes. *Nat Cell Biol* 10, 1301-1308,  
733 doi:10.1038/ncb1788 (2008).
- 734 12 McNally, F. J. Mechanisms of spindle positioning. *J Cell Biol* 200, 131-140,  
735 doi:10.1083/jcb.201210007 (2013).
- 736 13 Szollosi, D., Calarco, P. & Donahue, R. P. Absence of centrioles in the first and second  
737 meiotic spindles of mouse oocytes. *J Cell Sci* 11, 521-541 (1972).
- 738 14 Schuh, M. & Ellenberg, J. Self-organization of MTOCs replaces centrosome function  
739 during acentrosomal spindle assembly in live mouse oocytes. *Cell* 130, 484-498,  
740 doi:10.1016/j.cell.2007.06.025 (2007).
- 741 15 Xie, B. et al. Poly(ADP-ribose) mediates asymmetric division of mouse oocyte. *Cell Res*  
742 28, 462-475, doi:10.1038/s41422-018-0009-7 (2018).
- 743 16 Schatten, H., Schatten, G., Mazia, D., Balczon, R. & Simerly, C. Behavior of  
744 centrosomes during fertilization and cell division in mouse oocytes and in sea urchin  
745 eggs. *Proc Natl Acad Sci U S A* 83, 105-109, doi:10.1073/pnas.83.1.105 (1986).
- 746 17 Verlhac, M. H., Lefebvre, C., Guillaud, P., Rassinier, P. & Maro, B. Asymmetric division  
747 in mouse oocytes: with or without Mos. *Curr Biol* 10, 1303-1306 (2000).
- 748 18 Clift, D. & Schuh, M. A three-step MTOC fragmentation mechanism facilitates bipolar  
749 spindle assembly in mouse oocytes. *Nat Commun* 6, 7217, doi:10.1038/ncomms8217  
750 (2015).

- 751 19 Luksza, M., Queguigner, I., Verlhac, M. H. & Brunet, S. Rebuilding MTOCs upon  
752 centriole loss during mouse oogenesis. *Dev Biol* 382, 48-56,  
753 doi:10.1016/j.ydbio.2013.07.029 (2013).
- 754 20 Balboula, A. Z. et al. Haspin kinase regulates microtubule-organizing center clustering  
755 and stability through Aurora kinase C in mouse oocytes. *J Cell Sci* 129, 3648-3660,  
756 doi:10.1242/jcs.189340 (2016).
- 757 21 Breuer, M. et al. HURP permits MTOC sorting for robust meiotic spindle bipolarity,  
758 similar to extra centrosome clustering in cancer cells. *J Cell Biol* 191, 1251-1260,  
759 doi:10.1083/jcb.201005065 (2010).
- 760 22 Messinger, S. M. & Albertini, D. F. Centrosome and microtubule dynamics during  
761 meiotic progression in the mouse oocyte. *J Cell Sci* 100 ( Pt 2), 289-298 (1991).
- 762 23 Houliston, E., Pickering, S. J. & Maro, B. Redistribution of microtubules and  
763 pericentriolar material during the development of polarity in mouse blastomeres. *J Cell*  
764 *Biol* 104, 1299-1308, doi:10.1083/jcb.104.5.1299 (1987).
- 765 24 Meng, X. Q. et al. Localization of gamma-tubulin in mouse eggs during meiotic  
766 maturation, fertilization, and early embryonic development. *J Reprod Dev* 50, 97-105,  
767 doi:10.1262/jrd.50.97 (2004).
- 768 25 Maro, B., Houliston, E. & Paintrand, M. Purification of meiotic spindles and cytoplasmic  
769 asters from mouse oocytes. *Dev Biol* 129, 275-282, doi:10.1016/0012-1606(88)90374-0  
770 (1988).
- 771 26 Saskova, A. et al. Aurora kinase A controls meiosis I progression in mouse oocytes. *Cell*  
772 *Cycle* 7, 2368-2376, doi:10.4161/cc.6361 (2008).
- 773 27 Solc, P. et al. Aurora kinase A drives MTOC biogenesis but does not trigger resumption  
774 of meiosis in mouse oocytes matured in vivo. *Biol Reprod* 87, 85,  
775 doi:10.1095/biolreprod.112.101014 (2012).
- 776 28 Bury, L. et al. Plk4 and Aurora A cooperate in the initiation of acentriolar spindle  
777 assembly in mammalian oocytes. *J Cell Biol* 216, 3571-3590, doi:10.1083/jcb.201606077  
778 (2017).
- 779 29 Gueth-Hallonet, C. et al. gamma-Tubulin is present in acentriolar MTOCs during early  
780 mouse development. *J Cell Sci* 105 ( Pt 1), 157-166 (1993).
- 781 30 So, C. et al. A liquid-like spindle domain promotes acentrosomal spindle assembly in  
782 mammalian oocytes. *Science* 364, doi:10.1126/science.aat9557 (2019).
- 783 31 Ma, W. & Viveiros, M. M. Depletion of pericentrin in mouse oocytes disrupts  
784 microtubule organizing center function and meiotic spindle organization. *Mol Reprod*  
785 *Dev* 81, 1019-1029, doi:10.1002/mrd.22422 (2014).
- 786 32 Mogessie, B. & Schuh, M. Actin protects mammalian eggs against chromosome  
787 segregation errors. *Science* 357, doi:10.1126/science.aal1647 (2017).
- 788 33 Brunet, S. & Maro, B. Germinal vesicle position and meiotic maturation in mouse oocyte.  
789 *Reproduction* 133, 1069-1072, doi:10.1530/REP-07-0036 (2007).
- 790 34 Almonacid, M. et al. Active diffusion positions the nucleus in mouse oocytes. *Nat Cell*  
791 *Biol* 17, 470-479, doi:10.1038/ncb3131 (2015).
- 792 35 Colin, A. et al. Active diffusion in oocytes nonspecifically centers large objects during  
793 prophase I and meiosis I. *J Cell Biol* 219, doi:10.1083/jcb.201908195 (2020).
- 794 36 Almonacid, M. et al. Active Fluctuations of the Nuclear Envelope Shape the  
795 Transcriptional Dynamics in Oocytes. *Dev Cell* 51, 145-157 e110,  
796 doi:10.1016/j.devcel.2019.09.010 (2019).

- 797 37 Denk, W., Strickler, J. H. & Webb, W. W. Two-photon laser scanning fluorescence  
798 microscopy. *Science* 248, 73-76, doi:10.1126/science.2321027 (1990).
- 799 38 Duncan, F. E., Chiang, T., Schultz, R. M. & Lampson, M. A. Evidence that a defective  
800 spindle assembly checkpoint is not the primary cause of maternal age-associated  
801 aneuploidy in mouse eggs. *Biol Reprod* 81, 768-776, doi:10.1095/biolreprod.109.077909  
802 (2009).
- 803 39 Balboula, A. Z. & Schindler, K. Selective disruption of aurora C kinase reveals distinct  
804 functions from aurora B kinase during meiosis in mouse oocytes. *PLoS Genet* 10,  
805 e1004194, doi:10.1371/journal.pgen.1004194 (2014).
- 806 40 Watanabe, Y. et al. Autophagy controls centrosome number by degrading Cep63. *Nat*  
807 *Commun* 7, 13508, doi:10.1038/ncomms13508 (2016).
- 808 41 Honda, S. & Shimizu, S. Autophagy controls centrosome number. *Oncotarget* 8, 14277-  
809 14278, doi:10.18632/oncotarget.15362 (2017).
- 810 42 George, M. A., Pickering, S. J., Braude, P. R. & Johnson, M. H. The distribution of  
811 alpha- and gamma-tubulin in fresh and aged human and mouse oocytes exposed to  
812 cryoprotectant. *Mol Hum Reprod* 2, 445-456, doi:10.1093/molehr/2.6.445 (1996).
- 813 43 Roeles, J. & Tsiavalariis, G. Actin-microtubule interplay coordinates spindle assembly in  
814 human oocytes. *Nat Commun* 10, 4651, doi:10.1038/s41467-019-12674-9 (2019).
- 815 44 Schultz, R. M., Montgomery, R. R. & Belanoff, J. R. Regulation of mouse oocyte meiotic  
816 maturation: implication of a decrease in oocyte cAMP and protein dephosphorylation in  
817 commitment to resume meiosis. *Dev Biol* 97, 264-273, doi:10.1016/0012-  
818 1606(83)90085-4 (1983).
- 819 45 Stein, P. & Schindler, K. Mouse oocyte microinjection, maturation and ploidy  
820 assessment. *J Vis Exp*, doi:10.3791/2851 (2011).
- 821 46 Tsafiriri, A., Chun, S. Y., Zhang, R., Hsueh, A. J. & Conti, M. Oocyte maturation  
822 involves compartmentalization and opposing changes of cAMP levels in follicular  
823 somatic and germ cells: studies using selective phosphodiesterase inhibitors. *Dev Biol*  
824 178, 393-402, doi:10.1006/dbio.1996.0226 (1996).
- 825 47 Chatot, C. L., Ziomek, C. A., Bavister, B. D., Lewis, J. L. & Torres, I. An improved  
826 culture medium supports development of random-bred 1-cell mouse embryos in vitro. *J*  
827 *Reprod Fertil* 86, 679-688, doi:10.1530/jrf.0.0860679 (1989).
- 828 48 Shuda, K., Schindler, K., Ma, J., Schultz, R. M. & Donovan, P. J. Aurora kinase B  
829 modulates chromosome alignment in mouse oocytes. *Mol Reprod Dev* 76, 1094-1105,  
830 doi:10.1002/mrd.21075 (2009).
- 831 49 Bennabi, I. et al. Artificially decreasing cortical tension generates aneuploidy in mouse  
832 oocytes. *Nat Commun* 11, 1649, doi:10.1038/s41467-020-15470-y (2020).

833

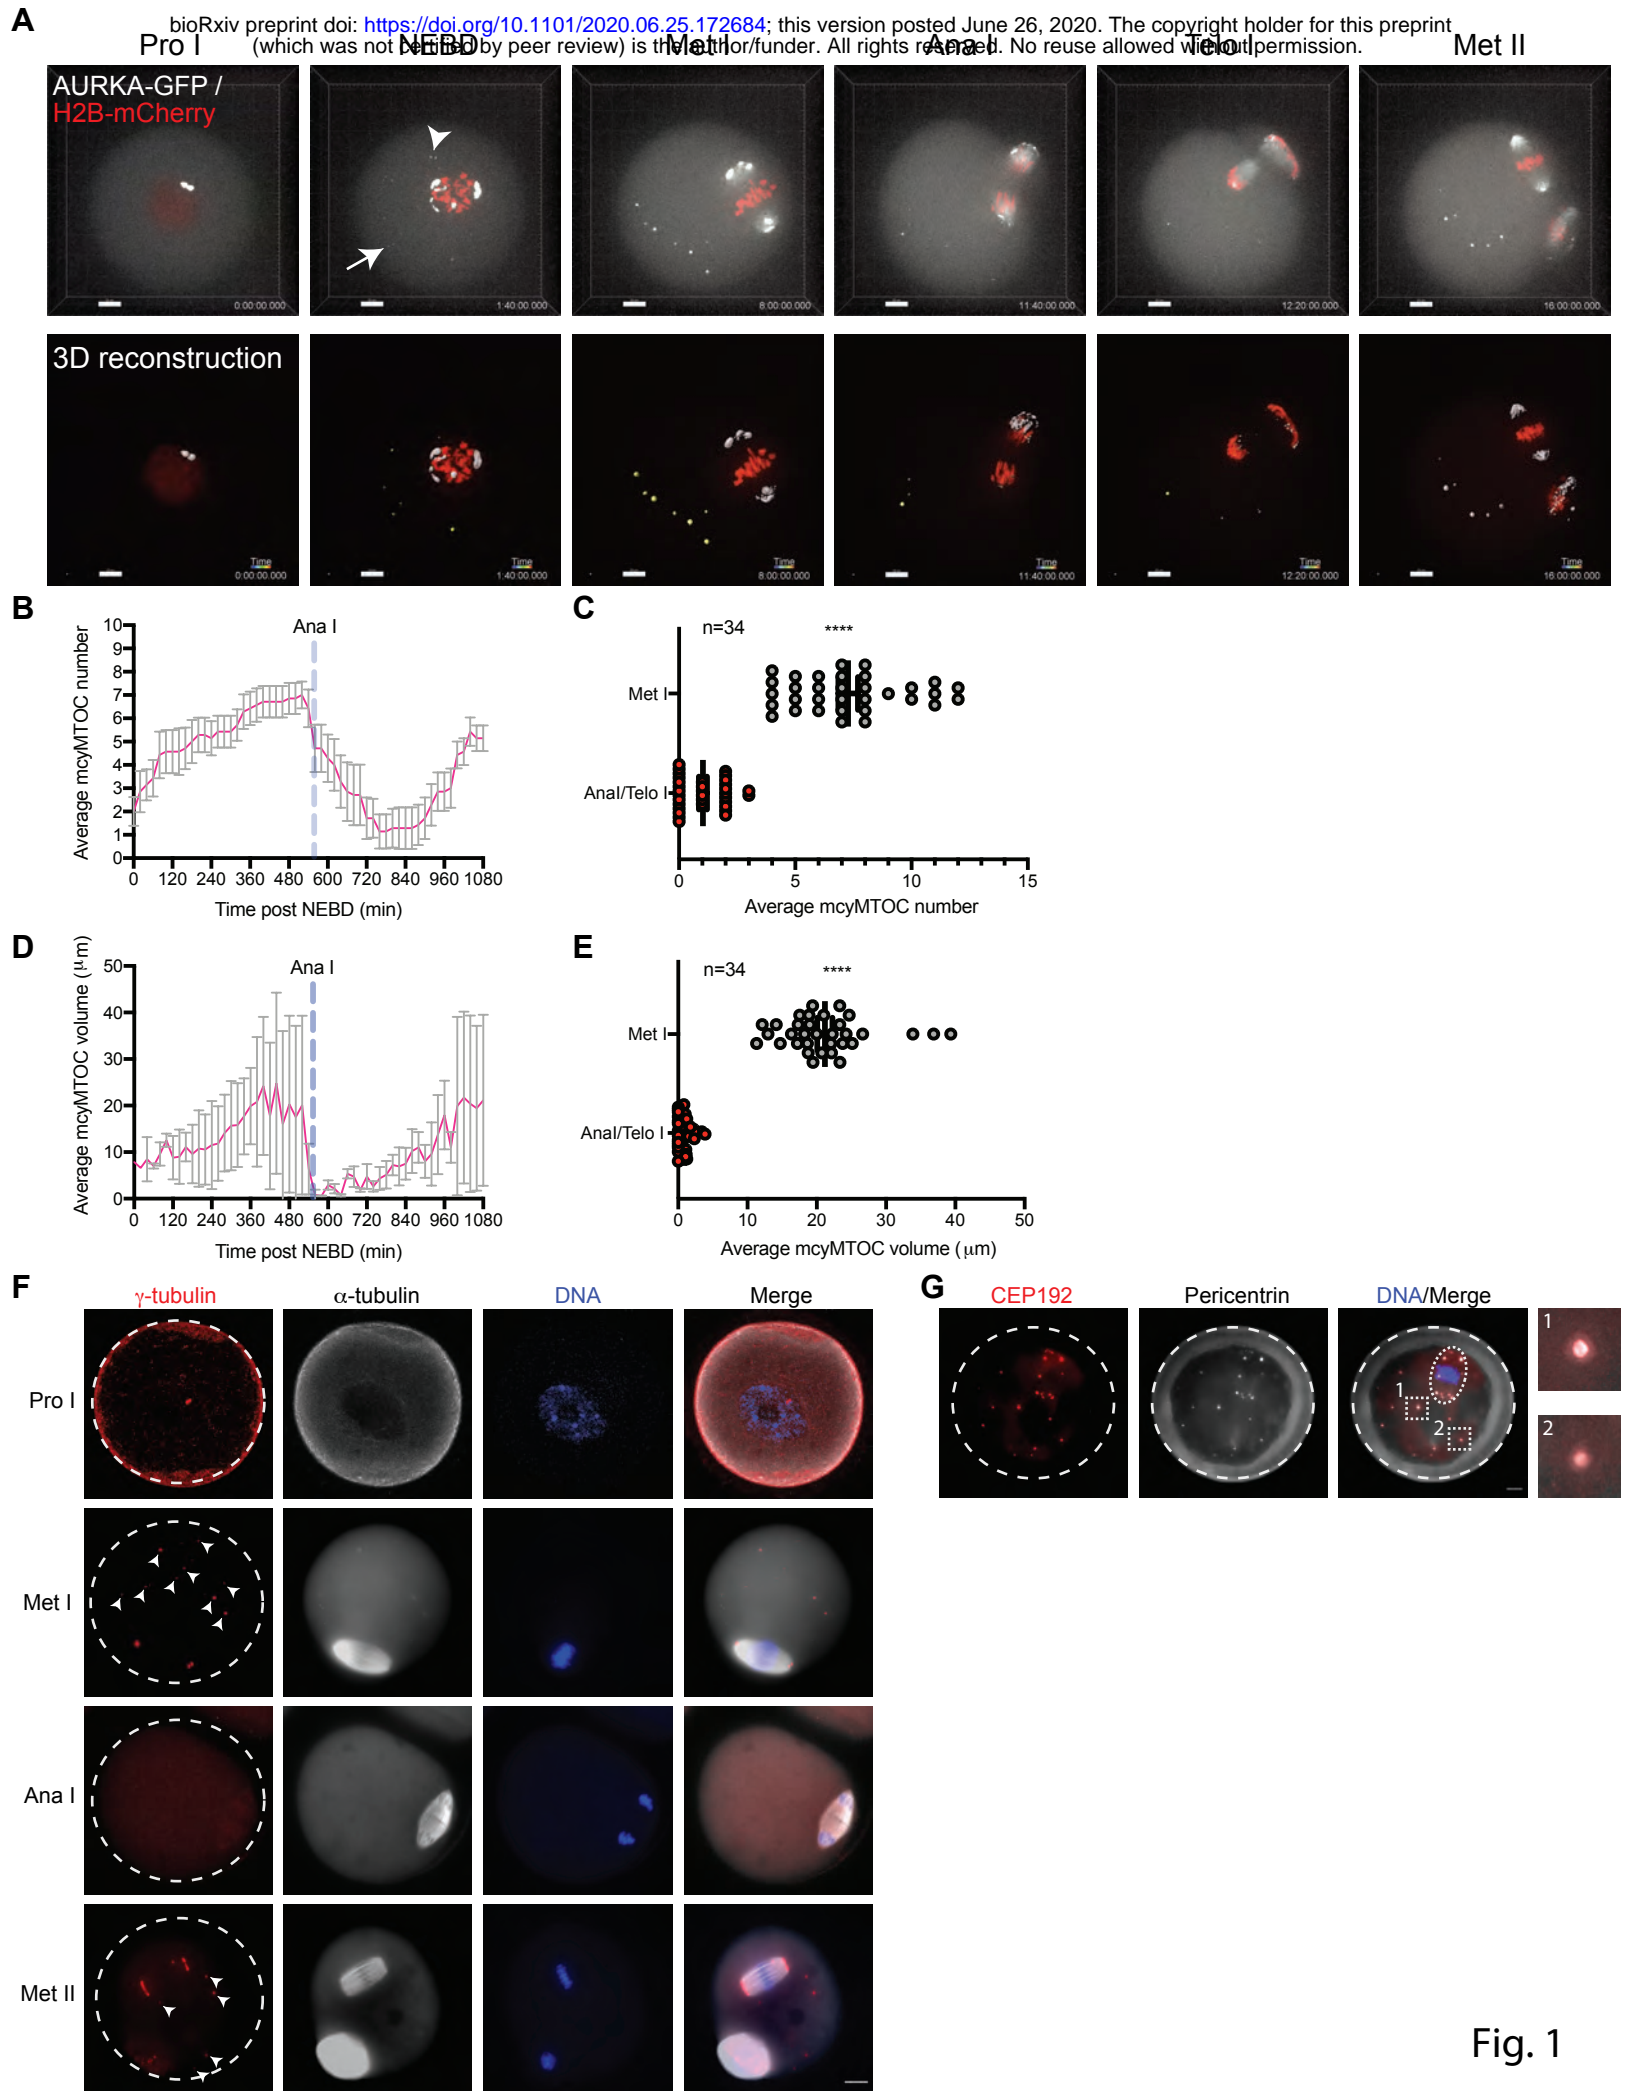

Fig. 1



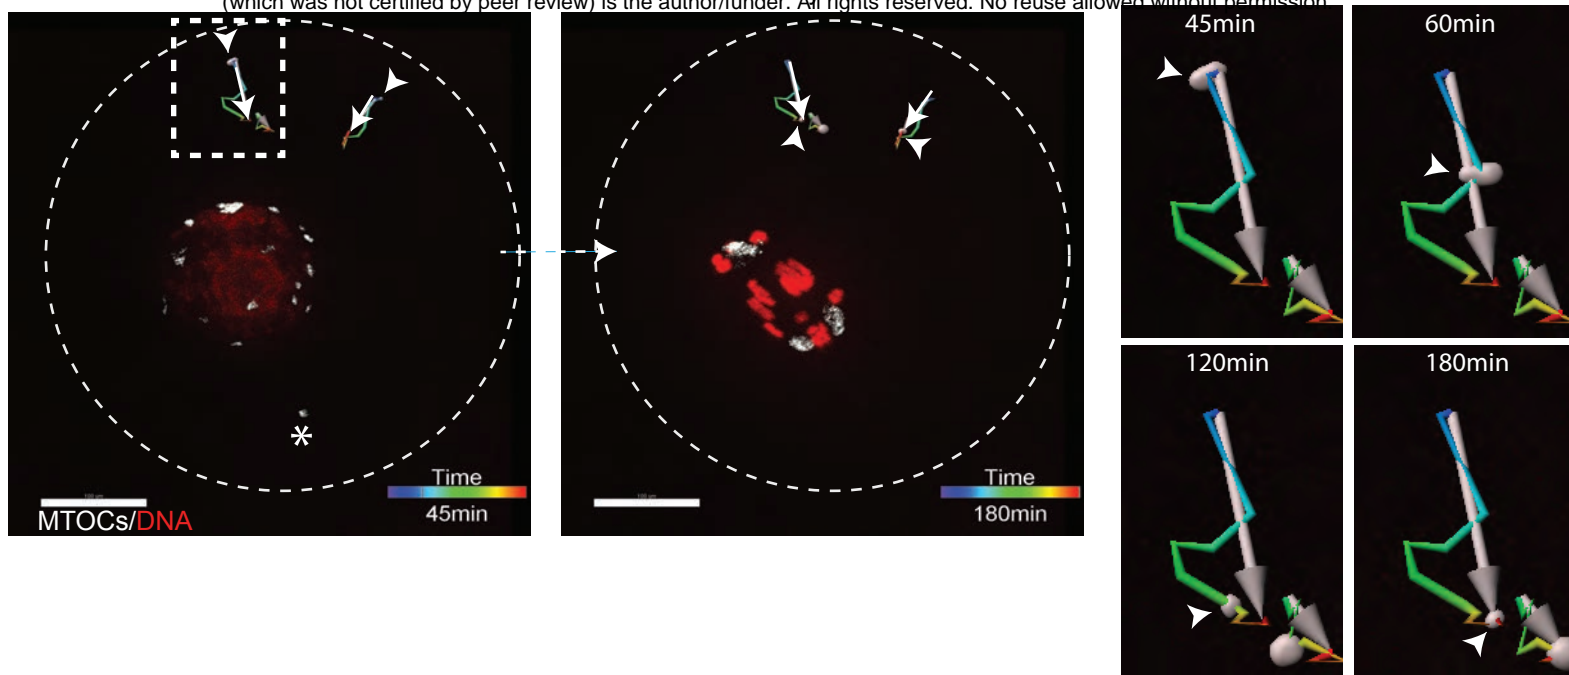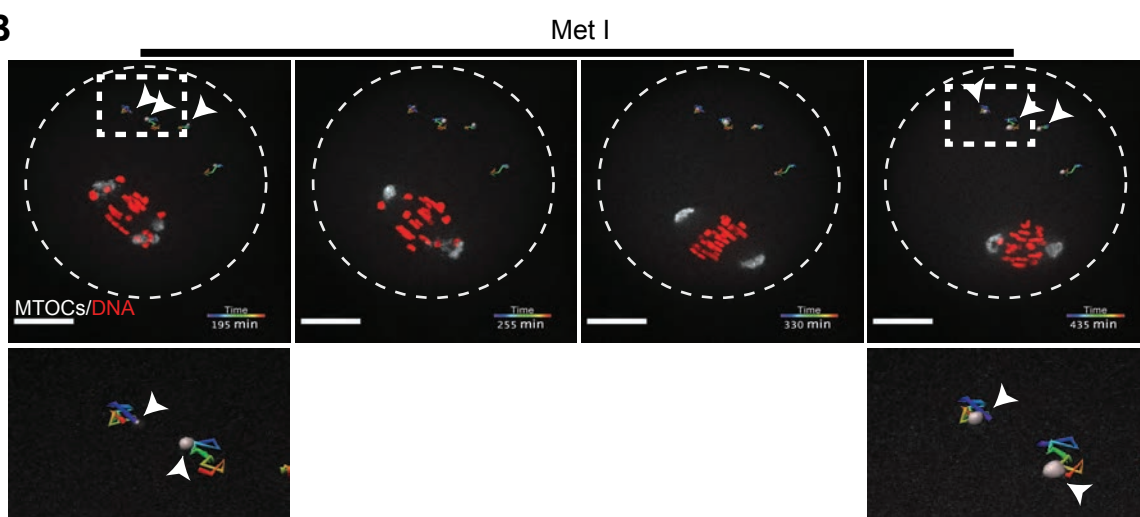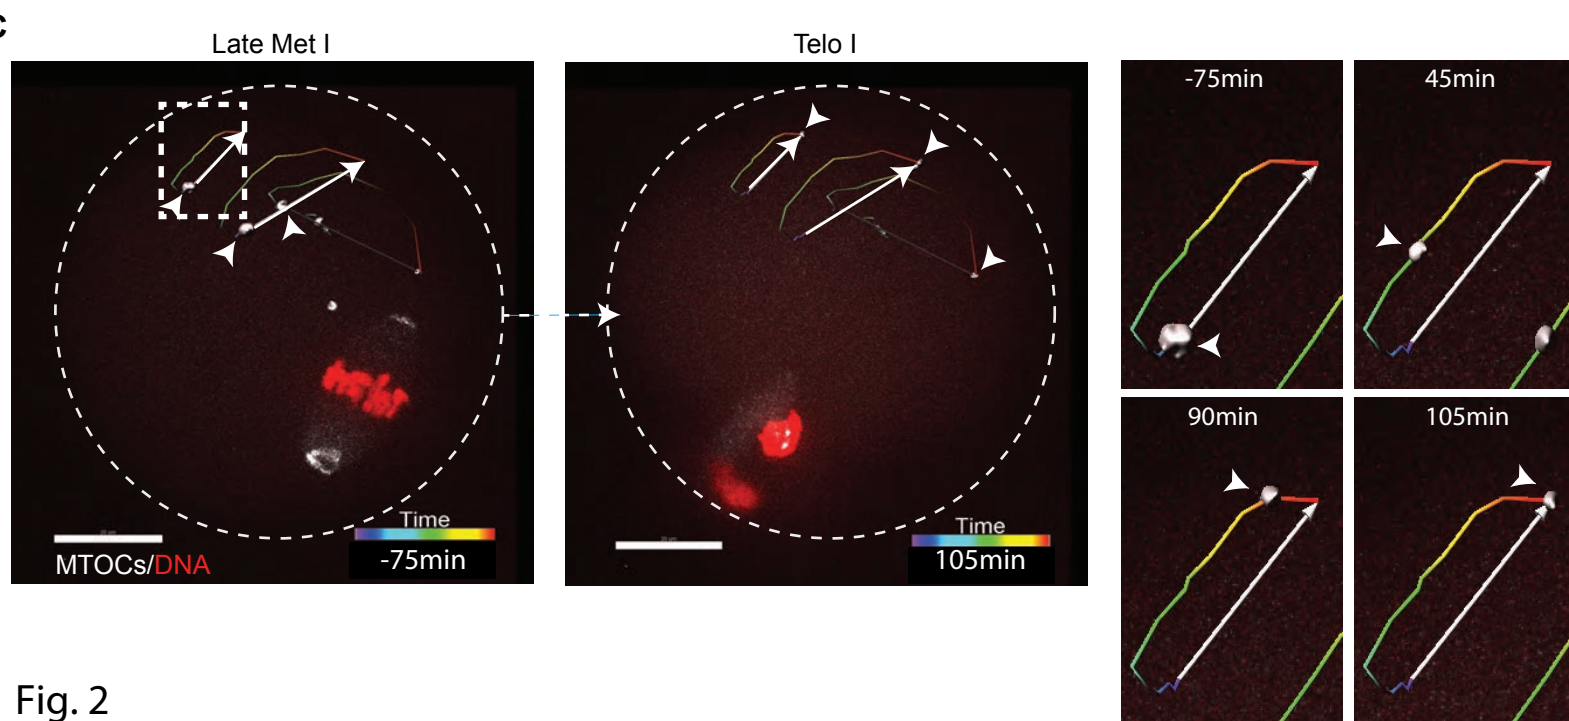

Fig. 2

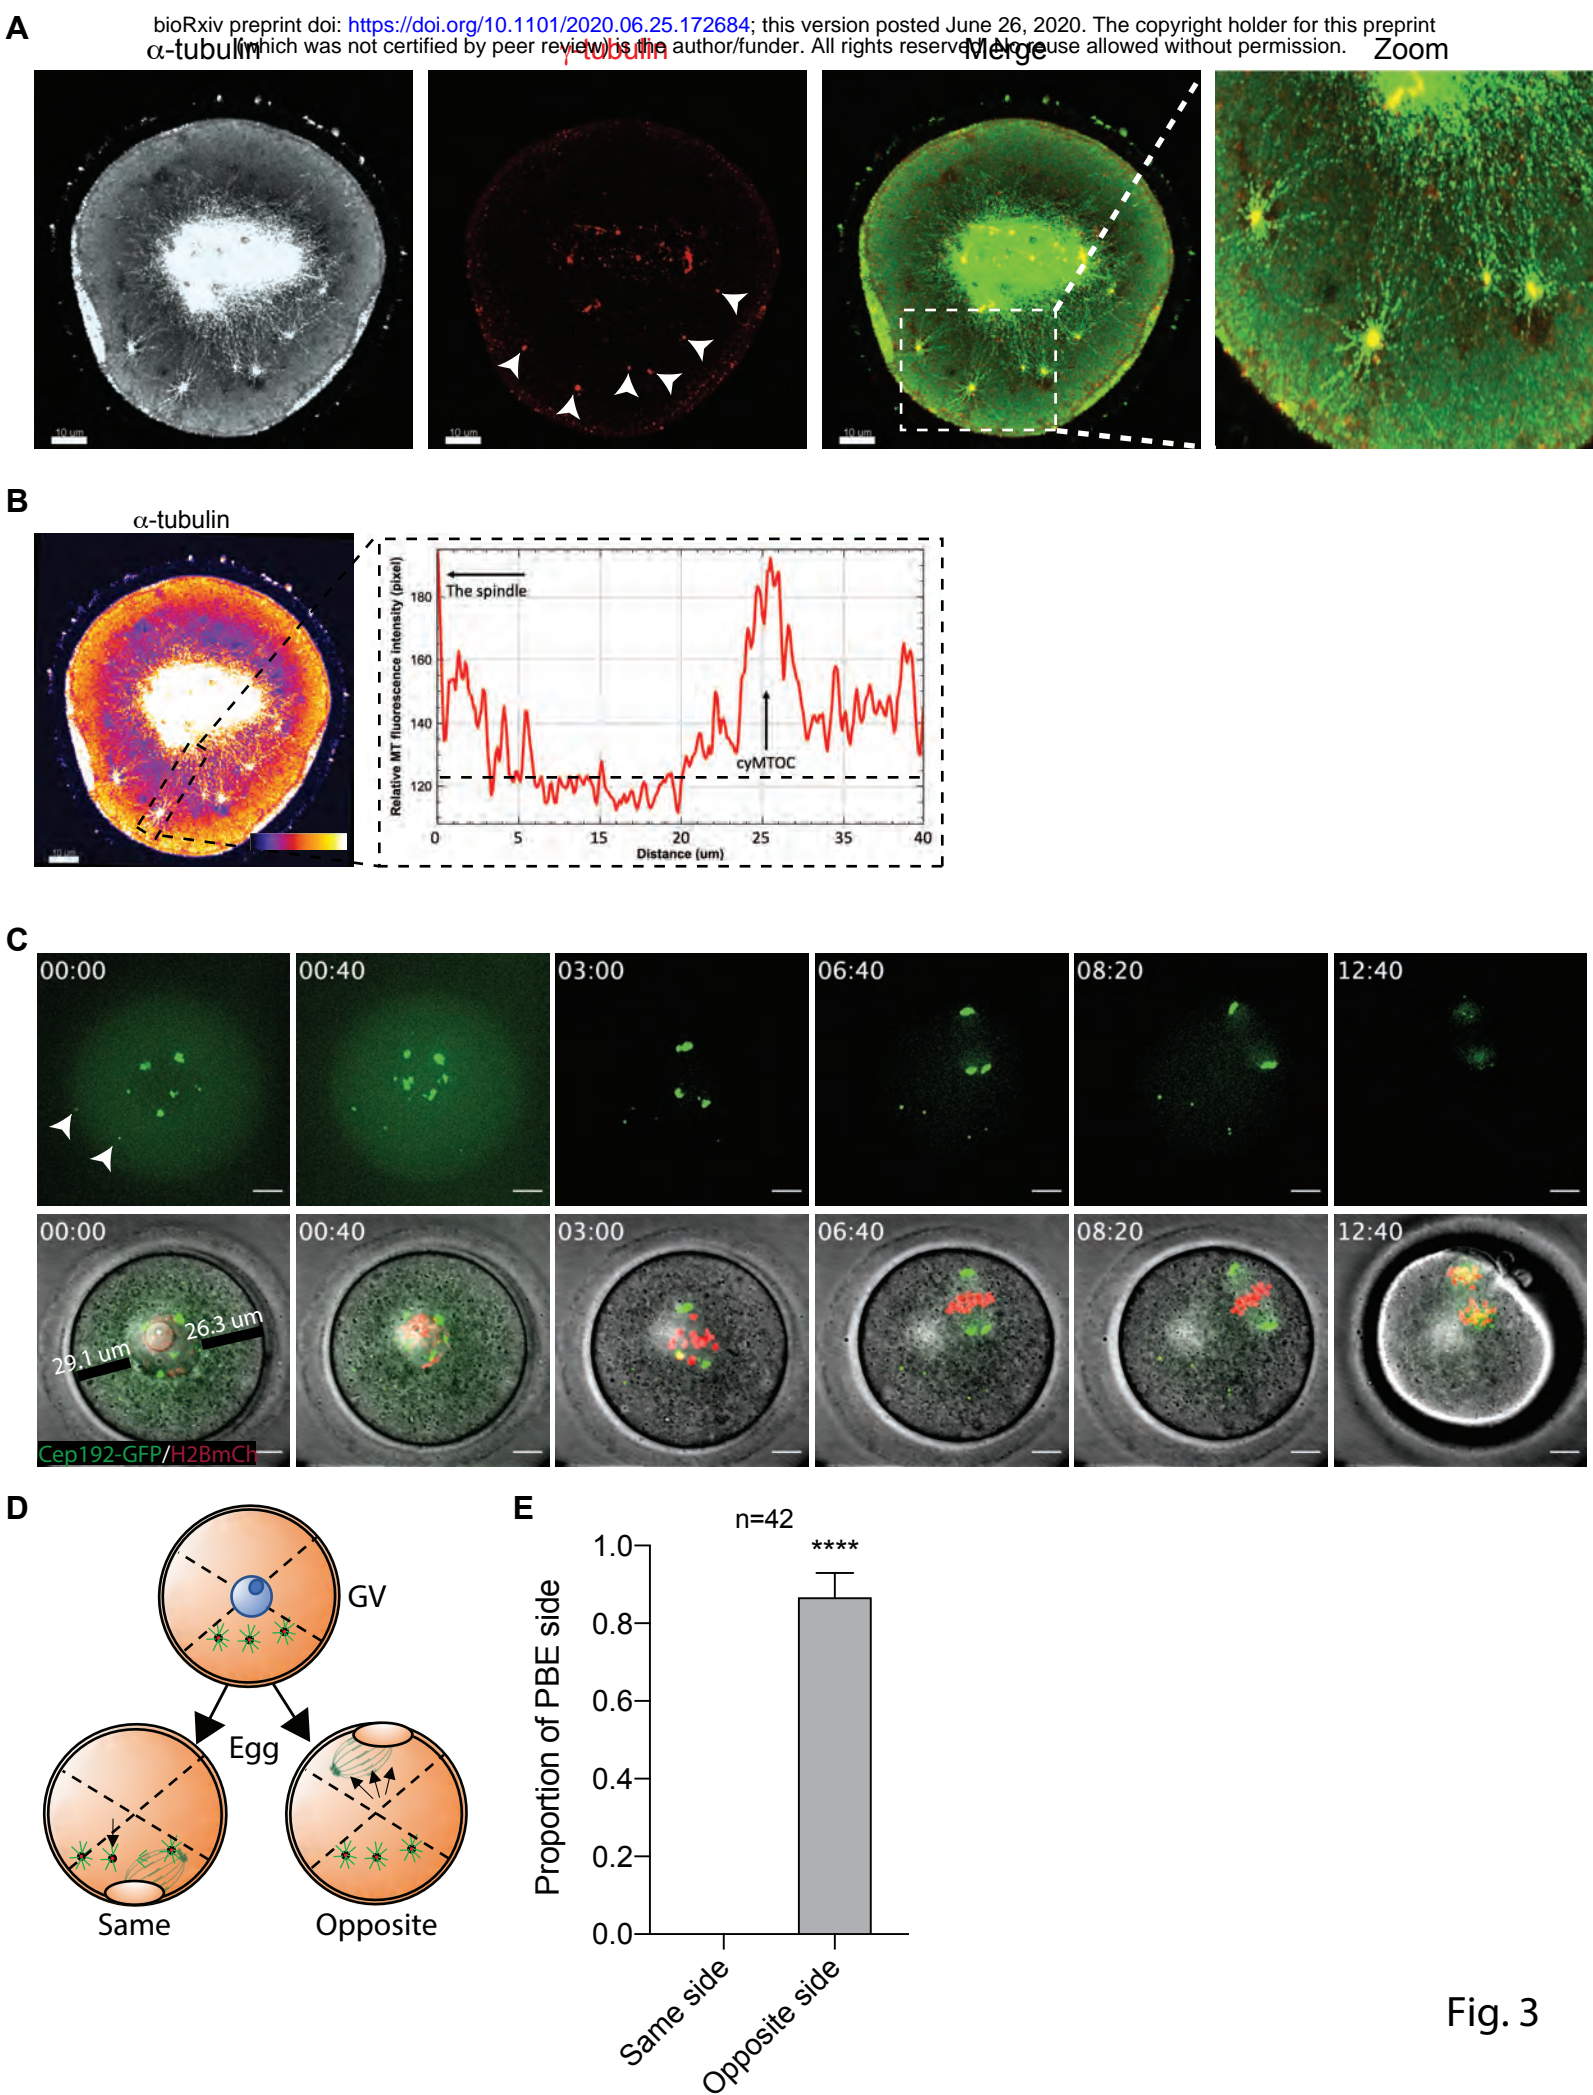

Fig. 3



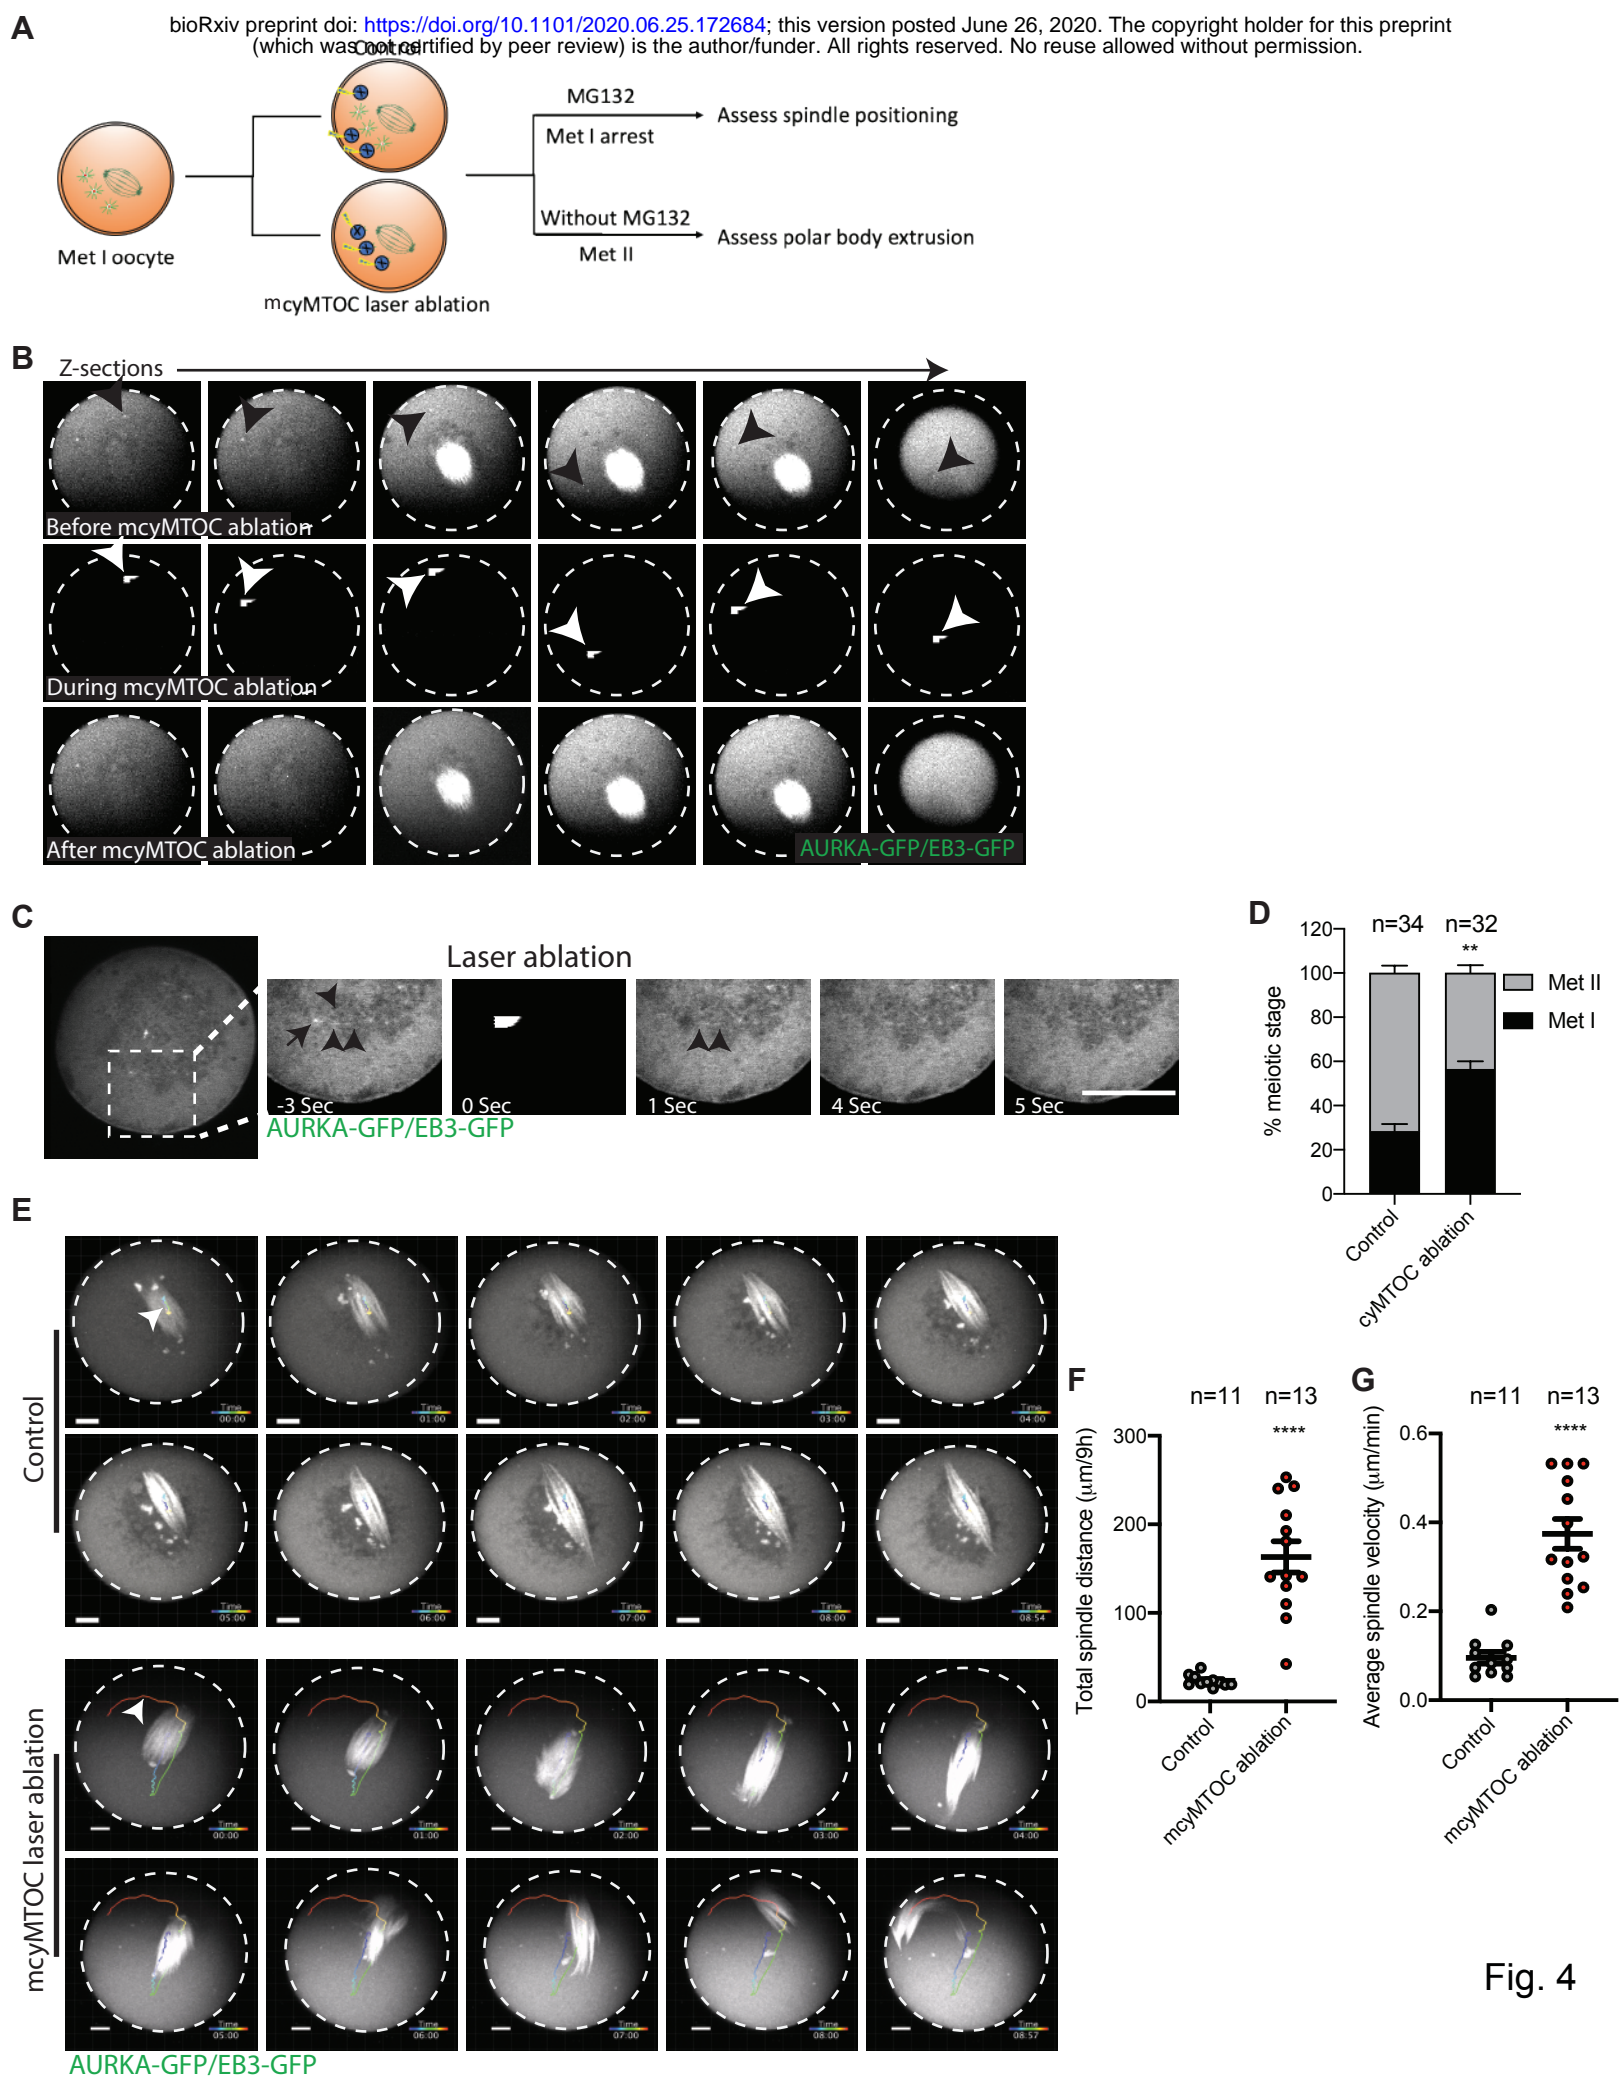

Fig. 4

Cep192

$\alpha$ -tubulin

DNA

Merge

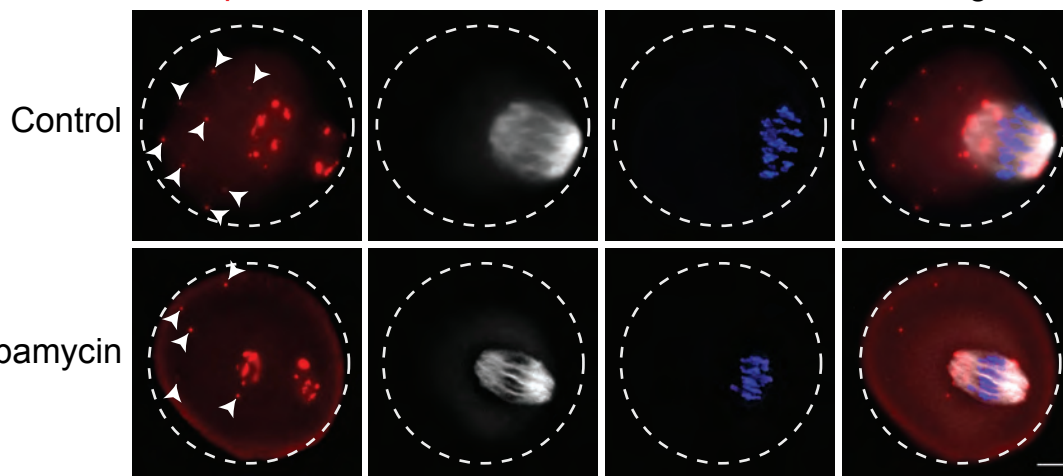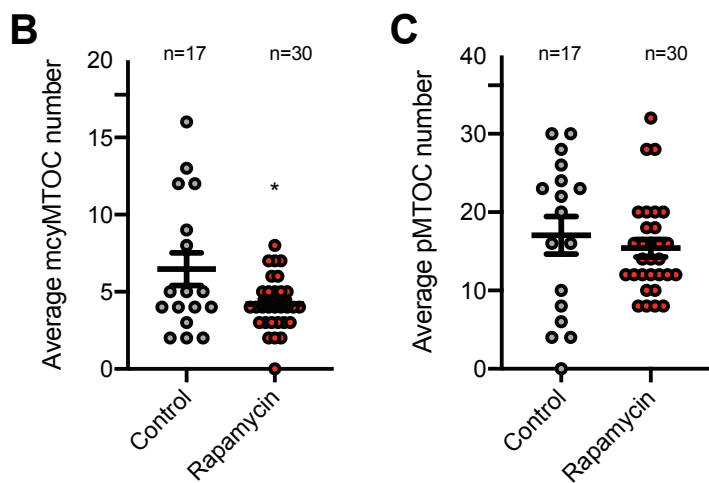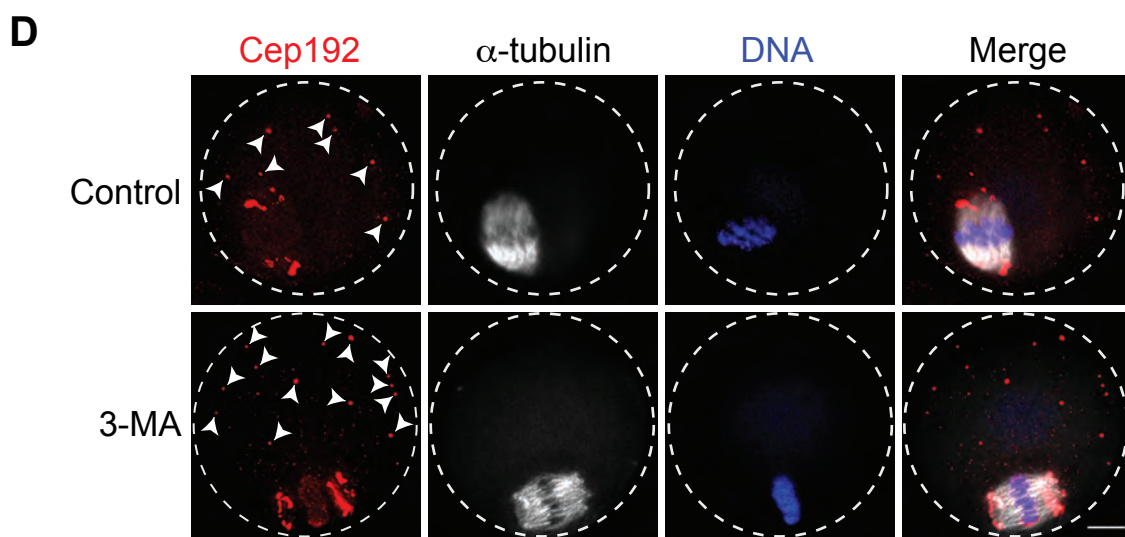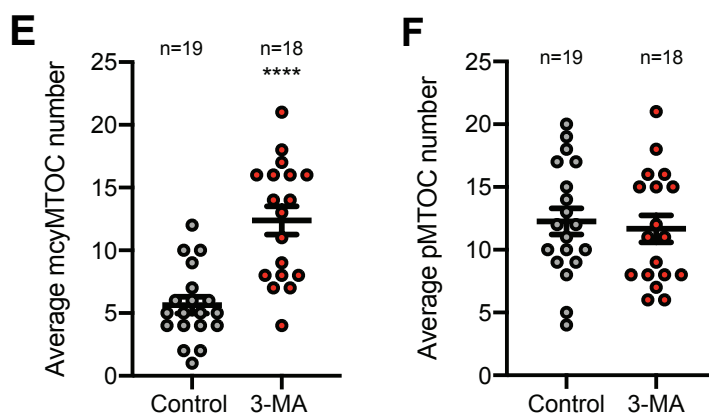



**A**

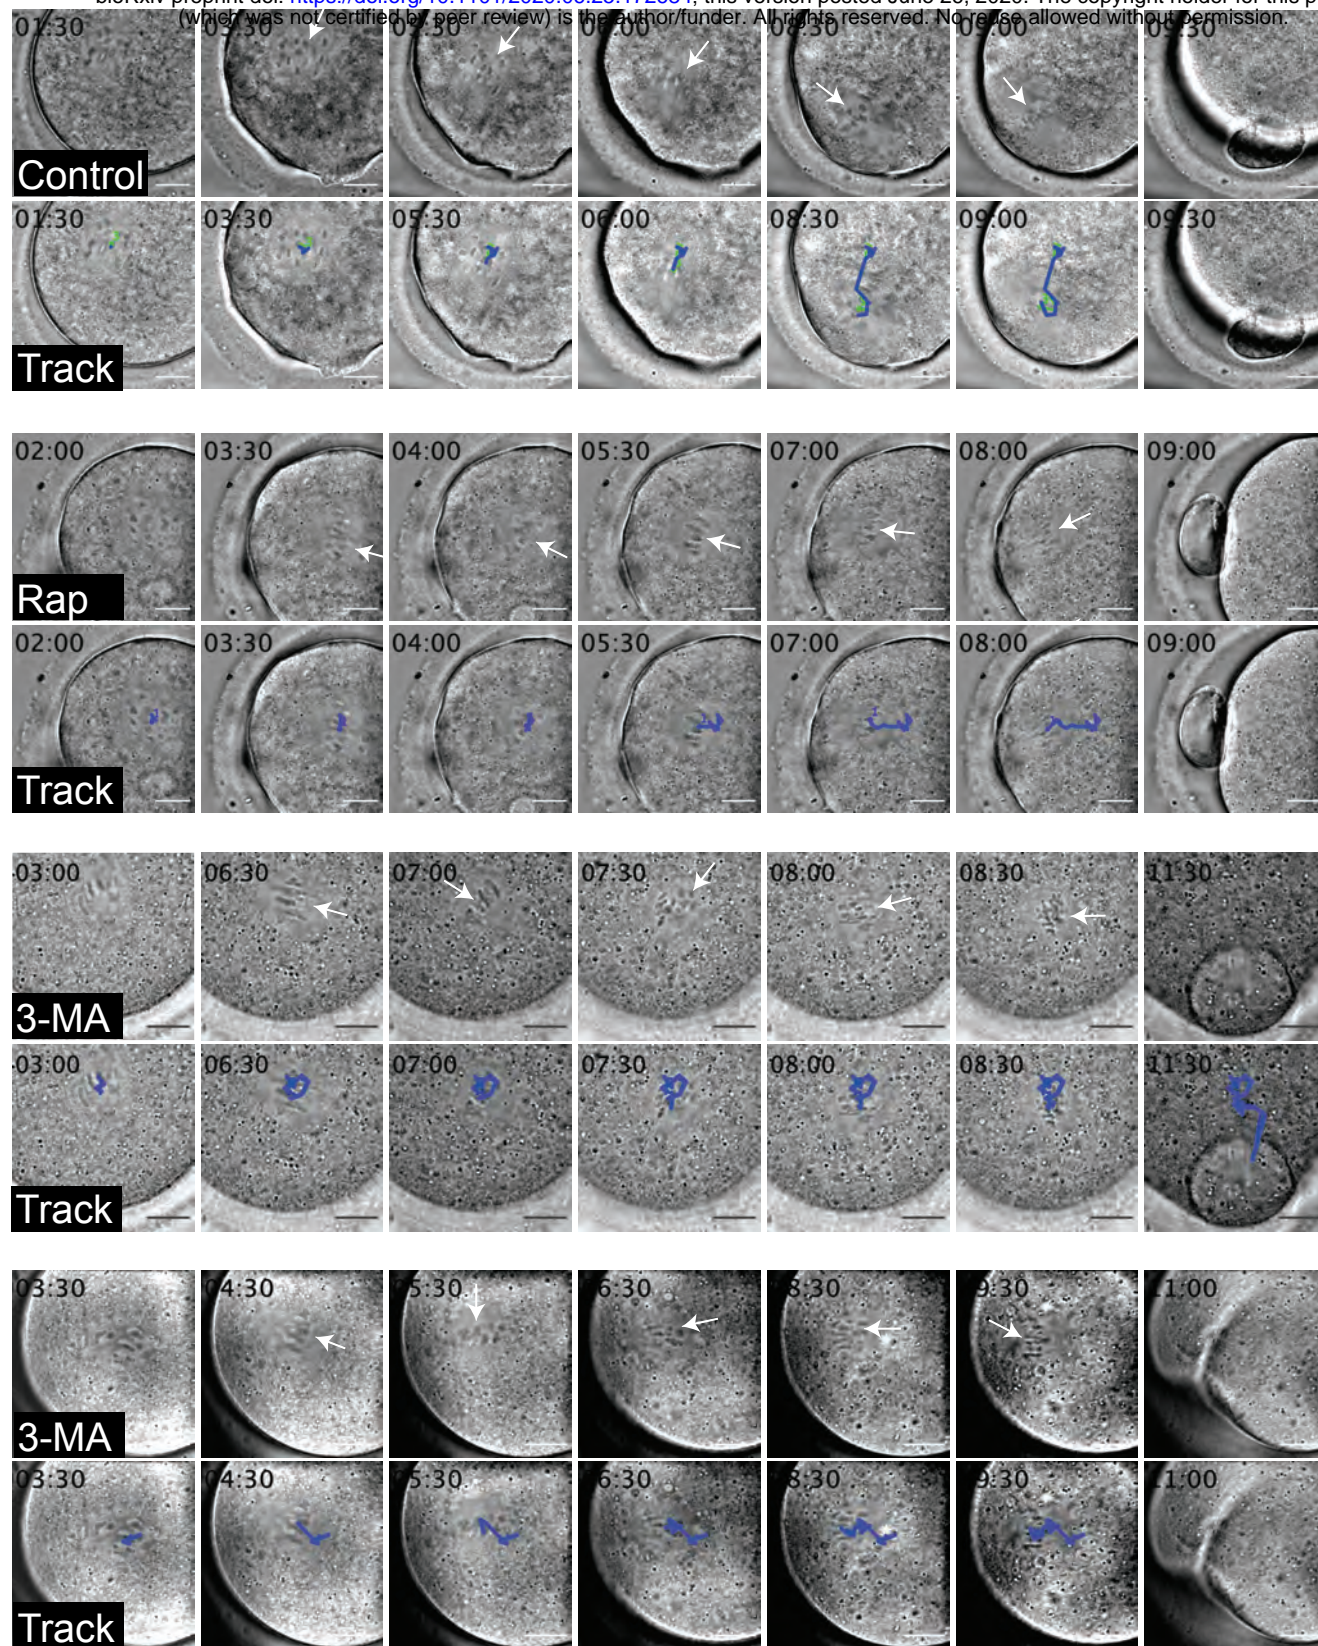

**B**

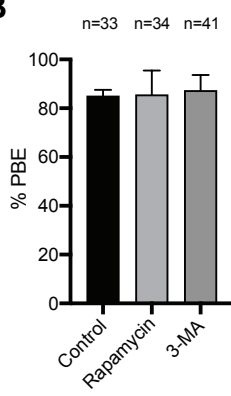

**C**

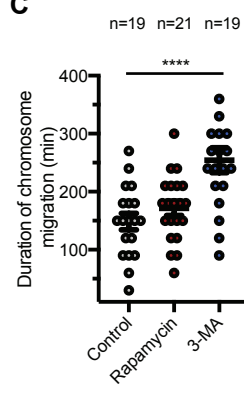

**D**

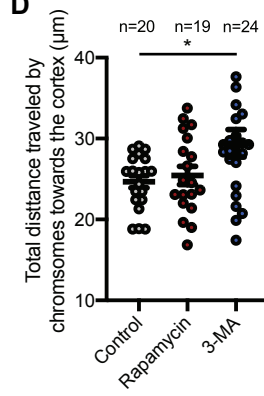

**E**

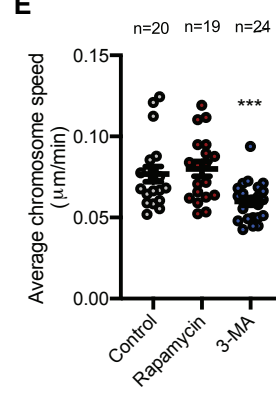

**F**

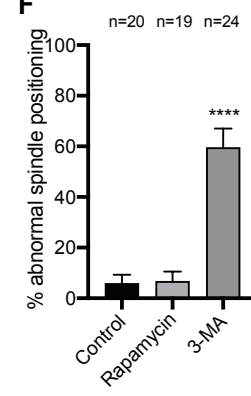

Fig. 6



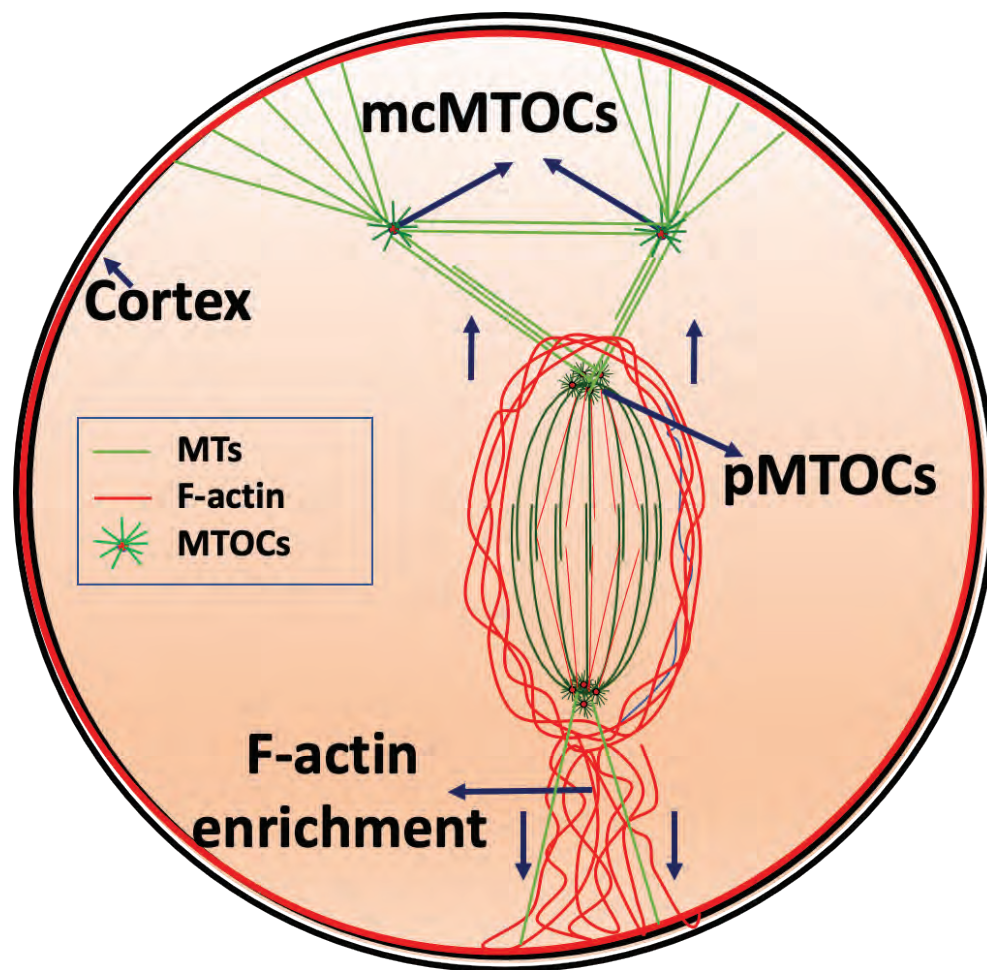

Fig. 7
